# Supplementary material for: The effect of aryl hydrazono ester containing dipeptides (AHEDs) on mosquito egg-laying behaviour
Source: Royal Society of Chemistry journal article supplement (doi:10.1039/c4nj00647j), 2014-01-01

## Supporting Information

### **The effect of aryl hydrazono ester containing dipeptides (AHED) on mosquito egg-laying behaviour**

**Sumit K. Agrawal,<sup>a</sup> Sachin Tikar,<sup>b</sup> Ruchi Yadav,<sup>b</sup> Anand K. Halve<sup>c</sup> and Manisha Sathe<sup>a,\*</sup>**

<sup>a</sup>Discovery Centre, Defence R & D Establishment, Jhansi Road, Gwalior 474 002 (M.P.), India. E-mail: [drmanishasathe@drde.drdo.in](mailto:drmanishasathe@drde.drdo.in) ; Tel: +91-751-2390462, Fax: +91-751-2340042. <sup>b</sup>Vector Management Division, Defence R & D Establishment, Jhansi Road, Gwalior. <sup>c</sup>Department of Chemistry, Jiwaji University, Gwalior (M.P.), India.

#### **Contents:**

- 1) Characterization details: S2-S4**
- 2) Copy of <sup>1</sup>H-NMR & <sup>13</sup>C-NMR Spectra (Evidence of purity): S5-S25**
- 3) <sup>1</sup>H-NMR and ROESY spectrum of compound 1a to explain keto-enol tautomerism : S26**

## Characterization of compounds

**Methyl 2-(4-aminobenzamido)-3-methylpentanoate (2).** White solid; Yield: 1.15 g; 60 %; m.p. 100-101 °C; FT-IR (KBr, neat,  $\text{cm}^{-1}$ ): 3453, 3360, 3239, 2964, 1732, 1603, 1527, 1370, 1317, 990, 842, 776;  $^1\text{H}$  NMR (400 MHz,  $\text{CDCl}_3$ ):  $\delta$  (ppm) 0.88-0.97 (6H, m), 1.21-1.28 (1H, m), 1.49-1.56 (1H, m), 1.95-2.01 (1H, m), 3.76 (3H, s), 4.03 (2NH, bs), 4.79 (1H, q,  $J = 5.2$  Hz), 6.52 (1NH, d,  $J = 8.4$  Hz), 6.65 (2H, d,  $J = 8.4$  Hz), 7.63 (2H, d,  $J = 8.4$  Hz);  $^{13}\text{C}$  NMR (100 MHz,  $\text{CDCl}_3$ ):  $\delta$  (ppm) 11.6, 15.5, 25.4, 38.3, 52.1, 56.7, 114.1, 123.5, 128.9, 150.0, 167.0, 173.0; ESI-MS:  $m/z$  287.5742  $[\text{M}+\text{Na}]^+$

**(E)-4-(2-(1-ethoxy-1,3-dioxobutan-2-ylidene)hydrazinyl) benzoic acid (3a).** Yellow solid; Yield: 1.85 g; 90 %; m.p. 201-202 °C; FT-IR (KBr, neat,  $\text{cm}^{-1}$ ): 3445, 2985, 2668, 2548, 2361, 1687, 1608, 1529, 1295, 1224, 1162, 1082, 770;  $^1\text{H}$  NMR (400 MHz,  $\text{DMSO}-d_6$ ):  $\delta$  (ppm) 1.26-1.33 (3H, m), 2.41 (3H, s), 4.26-4.35 (2H, m), 7.53 (2H, dd,  $J = 8.4$  and 8.8 Hz), 7.95 (2H, t,  $J = 8.0$  and 8.4 Hz), 11.58 (1NH, s);  $^{13}\text{C}$  NMR (100 MHz,  $\text{DMSO}-d_6$ ):  $\delta$  (ppm) 13.8, 14.1, 25.3, 30.4, 60.7, 61.3, 114.5, 115.6, 125.3, 126.5, 127.2, 131.0, 133.2, 145.4, 146.1, 162.3, 163.4, 166.9, 193.8, 195.4; ESI-MS:  $m/z$  301.5674  $[\text{M}+\text{Na}]^+$

**(E)-4-(2-(1-methoxy-1,3-dioxobutan-2-ylidene) hydrazinyl)benzoic acid (3b).** Yellow solid; Yield: 1.68 g; 87 %; m.p. 232-233 °C; FT-IR (KBr, neat,  $\text{cm}^{-1}$ ): 3445, 2959, 2670, 2551, 2361, 1675, 1629, 1607, 1521, 1429, 1332, 1281, 1194, 1084, 983, 799, 768;  $^1\text{H}$  NMR (400 MHz,  $\text{DMSO}-d_6$ ):  $\delta$  (ppm) 2.41 (3H, s), 3.84 (3H, s), 7.52 (2H, dd,  $J = 8.8$  Hz), 7.95 (2H, t,  $J = 8.4$  and 6.8 Hz), 11.60 (NH) and 14.01(OH) (1H, s), 12.77 (1 COOH, s);  $^{13}\text{C}$  NMR (100 MHz,  $\text{DMSO}-d_6$ ):  $\delta$  (ppm); 25.3, 30.5, 51.9, 52.2, 114.6, 115.7, 125.4, 127.2, 131.0, 132.9, 145.3, 146.0, 162.7, 164.4, 166.9, 193.7, 196.2; ESI-MS:  $m/z$  287.0784  $[\text{M}+\text{Na}]^+$

**(E)-4-(2-(1-isobutoxy-1,3-dioxobutan-2-ylidene)hydrazinyl) benzoic acid (3c).** Yellow solid; Yield: 2.03 g; 91 %; m.p. 133-134 °C; FT-IR (KBr, neat,  $\text{cm}^{-1}$ ): 3434, 2962, 2668, 2547, 2361, 1690, 1528, 1430, 1293, 1224, 1193, 1162, 1090, 853, 768;  $^1\text{H}$  NMR (400 MHz,  $\text{DMSO}-d_6$ ):  $\delta$  (ppm) 0.94 (keto form) (6H, d,  $J = 6.8$  Hz), 0.98 (enol form) (6H, d,  $J = 6.8$  Hz), 1.94-2.00 (combined) (1H, s), 2.42 (3H, s), 4.02 (enol form) (2H, d,  $J = 6.8$  Hz), 4.07 (keto form) (2H, d,  $J = 6.8$  Hz), 7.49 (enol form) (2H, d,  $J = 8.8$  Hz), 7.85 (enol form) (2H, d,  $J = 8.8$  Hz), 7.95 (combined) (2H, dd,  $J = 7.2$  and 6.4 Hz), 11.61 (keto form) (1H, s, (NH)), 12.75 (combined)(1COOH, 1bs), 13.94 (enol form) (1H, s, (OH));  $^{13}\text{C}$  NMR (100 MHz,  $\text{DMSO}-d_6$ ):  $\delta$  (ppm); 18.8, 18.9, 24.2, 25.3, 27.1, 27.4, 30.4, 36.2, 70.3, 70.9, 114.6, 115.5, 125.2, 126.7, 127.4, 130.9, 132.9, 145.5, 146.1, 162.3, 163.9, 166.7, 166.8, 193.7, 196.1; ESI-MS:  $m/z$  329.5463  $[\text{M}+\text{Na}]^+$

**4-((Z)-((Z)-1-ethoxy-4,4-trifluoro-3-hydroxy-1-oxobut-2-en-2-yl) diazenyl)benzoic acid (3d).** Yellow solid; Yield: 2.18 g; 90 %; m.p. 211-212 °C; FT-IR (KBr, neat,  $\text{cm}^{-1}$ ): 3421, 2989, 2680, 2557, 2361, 1721, 1610, 1538, 1434, 1402, 1296, 1262, 1216, 1190, 1118, 1014, 905, 854, 801, 768, 724;  $^1\text{H}$  NMR (400 MHz,  $\text{DMSO}-d_6$ ):  $\delta$  (ppm) 1.32 (3H, t,  $J = 6.8$  and 7.2 Hz), 4.36 (2H, q,  $J = 6.8$  and 7.2 Hz), 7.62 (2H, d,  $J = 8.4$  Hz), 8.02 (2H, d,  $J = 8.8$  Hz), 12.86 (2H, bs, (1NH, 1COOH));  $^{13}\text{C}$  NMR (100 MHz,  $\text{DMSO}-d_6$ ):  $\delta$  (ppm); 13.8, 61.7, 113.5, 116.3, 124.3, 127.7, 130.9, 131.1, 144.9, 160.8, 166.6; ESI-MS:  $m/z$  355.5089  $[\text{M}+\text{Na}]^+$

**(E)-4-(2-(1-ethoxy-1,3-dioxo-3-phenylpropan-2-ylidene) hydrazinyl)benzoic acid (3e).** Yellow solid; Yield: 2.21 g; 89 %; m.p. 214-215 °C; FT-IR (KBr, neat,  $\text{cm}^{-1}$ ): 3440, 3200, 3081, 2982, 2864, 2651, 2529, 1691, 1604, 1533, 1477, 1409, 1325, 1277, 1232, 1161, 902, 786, 771, 717, 692, 671;  $^1\text{H}$  NMR (400 MHz,  $\text{DMSO}-d_6$ ):  $\delta$  (ppm) 1.13 (keto form) (3H, t,  $J = 6.8$  and 7.2 Hz), 1.27 (enol form) (3H, t,  $J = 7.2$  Hz), 4.18 (keto form) (2H, q,  $J = 6.8$  and 7.2 Hz), 4.35 (enol form) (2H, q,  $J = 6.8$  and 7.2 Hz), 7.32 (2H, d,  $J = 8.4$ Hz), 7.39 (1H, d,  $J = 8.8$  Hz), 7.54-7.60 (3H, m), 7.65-7.73 (2H, m), 7.82 (1H, d,  $J = 7.2$  Hz), 7.88-7.92 (5H, m), 11.52 (keto form) (1H, s, (NH)), 11.99 (enol form) (1H, s, (OH)), 12.70 (1COOH, s);  $^{13}\text{C}$  NMR (100 MHz,  $\text{DMSO}-d_6$ ):  $\delta$  (ppm); 13.8, 13.9, 60.9, 61.4, 114.1, 114.6, 124.6, 125.7, 128.3, 128.4, 128.5, 129.0, 129.9, 130.6, 130.9, 131.0, 131.7, 132.8, 134.2, 135.7, 136.7, 146.0, 146.7, 162.1, 162.7, 166.8, 166.9, 188.8, 192.0; ESI-MS:  $m/z$  363.1568  $[\text{M}+\text{Na}]^+$

**(E)-methyl 2-(4-(2-(1-ethoxy-1,3-dioxobutan-2-ylidene) hydrazineyl)benzamido)-3-methylpentanoate (1a).** Yellow solid; Yield: 0.19 g; 65 %; m.p. 111-112 °C; FT-IR (KBr, neat,  $\text{cm}^{-1}$ ): 3235, 2964, 2361, 1745, 1692, 1626, 1524, 1369, 1262, 1170, 1083, 855, 799;  $^1\text{H}$  NMR (400 MHz,  $\text{CDCl}_3$ ):  $\delta$  (ppm) 0.88-0.92 (6H, m), 1.16-1.24 (1H, m), 1.31-1.35 (3H, m), 1.44-1.49 (1H, m), 1.94-1.96 (1H, m), 2.43 (keto form) & 2.52 (enol form) (3H, s,  $\text{CH}_3$ ), 3.71 (3H, s), 4.25-4.33 (2H, m), 4.71-4.76 (1H, m), 6.61 (1NH, d,  $J = 8.0$  Hz), 7.34 (2H, dd,  $J = 8.4$  Hz), 7.77 (2H, dd,  $J = 4.4$  Hz), 12.6 (keto form) & 14.56 (enol form) (1H, s);  $^{13}\text{C}$  NMR (100 MHz,  $\text{CDCl}_3$ ):  $\delta$  (ppm) 10.6, 13.1, 13.3, 14.5, 24.5, 25.8, 29.7, 37.2, 51.1, 55.9, 60.1, 60.6, 114.1, 115.0, 126.2, 127.7, 127.7, 127.9, 129.0, 129.7, 143.4, 143.5, 162.5, 163.6, 165.2, 171.7, 171.7, 193.2, 196.2; ESI-MS:  $m/z$  428.6332  $[\text{M}+\text{Na}]^+$

**(E)-methyl 2-(4-(2-(1-methoxy-1,3-dioxobutan-2-ylidene) hydrazinyl)benzamido)-3-methylpentanoate (1b).** Yellow solid; Yield: 0.17 g; 58 %; m.p. 115-116 °C; FT-IR (KBr, neat,  $\text{cm}^{-1}$ ): 3228, 3041, 2958, 2877, 2361, 1747, 1692, 1628, 1527, 1436, 1356, 1307, 1224, 1173, 949, 857, 772;  $^1\text{H}$  NMR (400 MHz,  $\text{CDCl}_3$ ):  $\delta$  (ppm) 0.92-1.00 (6H, m), 1.24-1.32 (1H, m), 1.52-1.58 (1H, m), 1.99-2.06 (1H, m), 2.51 (keto form) & 2.60 (enol form) (3H, s,  $\text{CH}_3$ ), 3.78 (3H, s), 3.90 (3H, s), 4.79-4.83 (1H, m), 6.82 (1NH, d,  $J = 8.4$  Hz), 7.41 (2H, dd,  $J = 8.4$  Hz), 7.85 (2H, t,  $J = 7.6$  & 8.4 Hz), 12.73 (keto form) & 14.67 (enol form) (1H,

s);  $^{13}\text{C}$  NMR (100 MHz,  $\text{CDCl}_3$ ):  $\delta$  (ppm) 11.2, 15.2, 25.2, 26.4, 30.4, 37.0, 51.8, 51.8, 56.7, 114.8, 115.7, 126.4, 127.8, 128.5, 128.6, 129.8, 130.5, 143.9, 144.0, 163.5, 164.7, 166.1, 172.4, 172.4, 193.9, 196.8; ESI-MS:  $m/z$  414.6075  $[\text{M}+\text{Na}]^+$

**(E)-methyl 2-(4-(2-(1-isobutoxy-1,3-dioxobutan-2-ylidene)hydrazinyl)benz-amido)-3-methylpentano-ate (1c).** Yellow brown semi solid; Yield: 0.17 g; 59 %; FT-IR (KBr, neat,  $\text{cm}^{-1}$ ): 3306, 2963, 2930, 2876, 1742, 1693, 1638, 1610, 1524, 1306, 1268, 1223, 1085, 849;  $^1\text{H}$  NMR (400 MHz,  $\text{CDCl}_3$ ):  $\delta$  (ppm) 0.83-1.11 (12H, m), 1.21-1.33 (2H, m), 1.51-1.75 (2H, m), 1.98-2.13 (2H, m), 2.51 (keto form) & 2.61 (enol form) (3H, s,  $\text{CH}_3$ ), 3.78 (3H, s), 4.09 (2H, q,  $J = 6.8$  Hz), 4.82 (1H, q,  $J = 5.2$  Hz), 6.66 (1NH, d,  $J = 8.4$  Hz), 7.41 (2H, dd,  $J = 8.4$  Hz), 7.85 (2H, dd,  $J = 3.2$  & 3.6 Hz), 12.67 (keto form) & 14.63 (enol form) (1H, s);  $^{13}\text{C}$  NMR (100 MHz,  $\text{CDCl}_3$ ):  $\delta$  (ppm) 10.6, 14.5, 18.1, 18.2, 24.4, 25.8, 26.7, 26.9, 29.7, 37.3, 51.2, 55.8, 70.1, 70.5, 114.1, 114.9, 126.1, 127.7, 127.8, 127.9, 129.0, 129.7, 143.4, 143.5, 162.5, 163.7, 165.2, 165.2, 171.7, 171.7, 193.1, 196.3; ESI-MS:  $m/z$  456.5388  $[\text{M}+\text{Na}]^+$

**Methyl 2-(4-((E)-(E)-1-ethoxy-4,4,4-trifluoro-3-hydroxy-1-oxobut-2-en-2-yl)diazanyl)benzamido)-3-methylpentan-oate (1d).** Yellow solid; Yield: 0.17 g; 62 %; m.p. 100-101  $^\circ\text{C}$ ; FT-IR (KBr, neat,  $\text{cm}^{-1}$ ): 3313, 3173, 2962, 2877, 2361, 1744, 1720, 1685, 1635, 1531, 1505, 1250, 1212, 1151, 1031, 908, 853, 808;  $^1\text{H}$  NMR (400 MHz,  $\text{CDCl}_3$ ):  $\delta$  (ppm) 0.92-0.99 (6H, m), 1.24-1.31 (1H, m), 1.43 (3H, t,  $J = 7.2$  Hz), 1.50-1.57 (1H, m), 1.99-2.05 (1H, m), 3.78 (3H, s), 4.42 (2H, q,  $J = 7.2$  Hz), 4.82 (1H, q,  $J = 4.8$  Hz), 6.67 (1NH, d,  $J = 8.4$  Hz), 7.46 (2H, d,  $J = 8.8$  Hz), 7.89 (2H, d,  $J = 8.8$  Hz), 13.42 (enol form) (1OH, s);  $^{13}\text{C}$  NMR (100 MHz,  $\text{CDCl}_3$ ):  $\delta$  (ppm) 10.6, 13.0, 14.5, 24.4, 37.2, 51.2, 55.9, 61.2, 114.5, 115.3, 117.4, 121.5, 128.0, 130.8, 142.4, 162.3, 164.3, 164.9, 171.6, 173.4, 173.8; ESI-MS:  $m/z$  482.2170  $[\text{M}+\text{Na}]^+$ ,  $m/z$  492.0632  $[\text{M}+\text{H}+\text{MeOH}]^+$

**(E)-Methyl 2-(4-(2-(1-ethoxy-1,3-dioxo-3-phenylpropan-2-ylidene)hydrazinyl)benz-amido)-3-methylpentanoate (1e).** Yellow brown semi solid; Yield: 0.18 g; 64 %; FT-IR (KBr, neat,  $\text{cm}^{-1}$ ): 3350, 2965, 2877, 2361, 1741, 1657, 1610, 1528, 1328, 1303, 1230, 1174, 1017, 904, 850, 765, 717, 670;  $^1\text{H}$  NMR (400 MHz,  $\text{CDCl}_3$ ):  $\delta$  (ppm) 0.93-0.99 (6H, m), 1.25-1.27 (1H, m), 1.34 (3H, t,  $J = 7.2$  Hz), 1.48-1.59 (1H, m), 1.99-2.00 (1H, m), 3.76 (3H, s), 4.36 (2H, q,  $J = 7.2$  Hz), 4.79 (1H, q,  $J = 4.8$  & 5.2 Hz), 6.69 (1NH, d,  $J = 8.4$  Hz), 7.20 (2H, d,  $J = 8.4$  Hz), 7.44-7.59 (3H, m), 7.58 (2H, d,  $J = 7.2$  Hz), 7.93 (2H, t,  $J = 7.6$  Hz), 12.67 (keto form) & 13.25 (enol form) (1H, s);  $^{13}\text{C}$  NMR (100 MHz,  $\text{CDCl}_3$ ):  $\delta$  (ppm) 11.3, 13.8, 13.8, 15.3, 25.2, 37.9, 51.9, 56.7, 61.3, 61.4, 114.7, 114.9, 127.9, 127.9, 128.6, 129.3, 130.1, 132.5, 137.1, 137.6, 144.3, 144.4, 163.3, 164.2, 166.1, 172.5, 189.0, 191.2; ESI-MS:  $m/z$  490.2157  $[\text{M}+\text{Na}]^+$

**(E)-Ethyl 2-(2-(4-(1-methoxy-1-oxo-3-phenylpropan-2-ylcarbamoyl)phenyl)hydraz-ono)-3-oxobutanoate (1f).** Yellow brown semi solid; Yield: 0.19 g; 60 %; FT-IR (KBr, neat,  $\text{cm}^{-1}$ ): 3364, 2985, 2953, 2361, 1744, 1689, 1639, 1609, 1523, 1365, 1304, 1221, 1170, 1082, 1017, 851, 765, 701;  $^1\text{H}$  NMR (400 MHz,  $\text{CDCl}_3$ ):  $\delta$  (ppm) 1.37-1.42 (3H, m), 2.50 (keto form) and 2.59 (enol form) (3H, s), 3.20-3.32 (2H, m), 3.76 (3H, s), 4.32-4.40 (2H, m), 5.06-5.11 (1H, m), 6.65 (1NH, d,  $J = 7.2$  Hz), 7.14 (2H, d,  $J = 6.4$  Hz), 7.23-7.42 (5H, m), 7.76 (2H, dd,  $J = 5.2$  & 5.6 Hz), 12.68 (keto form) & 14.61 (enol form) (1H, s);  $^{13}\text{C}$  NMR (100 MHz,  $\text{CDCl}_3$ ):  $\delta$  (ppm) 14.0, 14.2, 26.7, 30.7, 37.8, 52.3, 53.5, 61.1, 61.6, 115.1, 115.9, 127.1, 128.5, 128.6, 128.6, 128.7, 129.2, 129.7, 130.4, 135.8, 144.3, 144.4, 163.4, 164.5, 165.9, 172.0, 172.0, 194.2, 197.2; ESI-MS:  $m/z$  462.1385  $[\text{M}+\text{Na}]^+$

**(E)-Methyl 2-(2-(4-(1-methoxy-1-oxo-3-phenyl propan-2-ylcarbamoyl)phenyl)hydrazono)-3-oxobutanoate (1g).** Yellow brown semi solid; Yield: 0.19 g; 58 %; FT-IR (KBr, neat,  $\text{cm}^{-1}$ ): 3364, 3028, 2953, 2361, 1736, 1688, 1639, 1610, 1510, 1436, 1360, 1307, 1222, 1170, 1086, 849, 751, 701;  $^1\text{H}$  NMR (400 MHz,  $\text{CDCl}_3$ ):  $\delta$  (ppm) 2.51 & 2.61 (3H, s), 3.24-3.29 (2H, m), 3.77 & 3.78 (3H, s), 3.89, 3.92 & 3.95 (3H, s), 5.07-5.10 (1H, m), 6.55 (1NH, d,  $J = 7.6$  Hz), 7.13 (2H, d,  $J = 7.2$  Hz), 7.24-7.45 (4H, m), 7.71-7.78 (2H, m), 12.74 (keto form) & 14.67 (enol form) (1H, s);  $^{13}\text{C}$  NMR (100 MHz,  $\text{CDCl}_3$ ):  $\delta$  (ppm) 26.7, 30.7, 37.8, 52.1, 52.2, 52.4, 53.5, 114.2, 115.2, 116.1, 117.3, 126.8, 127.1, 128.1, 128.2, 128.6, 128.6, 128.7, 128.8, 129.2, 129.9, 130.5, 135.8, 135.9, 144.2, 144.3, 144.4, 159.8, 163.9, 165.0, 165.9, 166.1, 172.0, 172.1, 194.3; ESI-MS:  $m/z$  448.1696  $[\text{M}+\text{Na}]^+$

**(E)-Isobutyl 2-(2-(4-(1-methoxy-1-oxo-3-phenylpropan-2-ylcarbamoyl)phenyl)hydrazono)-3-oxobutanoate (1h).** Yellow brown semi solid; Yield: 0.17 g; 55 %; FT-IR (KBr, neat,  $\text{cm}^{-1}$ ): 3376, 3029, 2959, 2360, 1745, 1693, 1638, 1509, 1360, 1221, 1170, 1083, 849, 766, 700;  $^1\text{H}$  NMR (400 MHz,  $\text{CDCl}_3$ ):  $\delta$  (ppm) 1.03 (6H, q,  $J = 6.8$  Hz), 2.04-2.10 (1H, m), 2.50 (keto) & 2.60 (enol) (3H, s), 3.20-3.32 (2H, m), 3.77 (3H, d,  $J = 1.6$  Hz), 4.08 (2H, t,  $J = 6.8$  Hz), 5.06-5.11 (1H, m), 6.61 (1NH, d,  $J = 7.6$  Hz), 7.14 (2H, t,  $J = 4.4$  & 2.4 Hz), 7.23-7.43 (5H, m), 7.76 (2H, dd,  $J = 2.4$  & 2.0 Hz), 12.65 (keto form) & 14.60 (enol form) (1H, s);  $^{13}\text{C}$  NMR (100 MHz,  $\text{CDCl}_3$ ):  $\delta$  (ppm) 14.1, 14.5, 17.2, 18.9, 19.1, 20.9, 23.3, 23.8, 24.6, 26.7, 27.6, 27.8, 28.4, 30.6, 36.6, 37.8, 52.3, 53.5, 60.2, 71.0, 71.4, 115.0, 115.8, 127.0, 127.1, 128.5, 128.6, 128.7, 129.2, 129.6, 130.3, 135.8, 144.3, 144.5, 163.3, 164.6, 165.9, 165.9, 171.0, 172.0, 172.1, 194.0, 197.1; ESI-MS:  $m/z$  490.2568  $[\text{M}+\text{Na}]^+$

**(E)-Ethyl 4,4,4-trifluoro-3-hydroxy-2-((E)-(4-(1-methoxy-1-oxo-3-phenylpropan-2-ylcarbamoyl)phenyl)diazanyl)but-2-enoate (1i).** Yellow solid; Yield: 0.19 g; 65 %; m.p. 137-138  $^\circ\text{C}$ ; FT-IR (KBr, neat,  $\text{cm}^{-1}$ ): 3316, 3166, 3032, 2361, 1753, 1719, 1635, 1530, 1251, 1173, 1155, 906, 855, 810, 771, 699;  $^1\text{H}$  NMR (400 MHz,  $\text{CDCl}_3$ ):  $\delta$  (ppm) 1.41 (3H, t,  $J = 7.2$  Hz), 3.19-3.32 (2H, m), 3.77 (3H, s), 4.41 (2H, q,  $J = 6.8$  & 7.2 Hz), 5.08 (1H, q,  $J = 6.0$  Hz), 6.69 (1NH, d,  $J = 8.4$  Hz), 7.14 (2H, d,  $J = 6.8$  Hz), 7.24-7.43 (3H, m), 7.42 (2H, d,  $J = 8.4$  Hz), 7.79 (2H, d,  $J = 8.8$  Hz), 13.39 (enol form) (1OH, s);  $^{13}\text{C}$  NMR (100 MHz,

CDCl<sub>3</sub>:  $\delta$  (ppm) 13.8, 37.7, 52.3, 53.6, 62.0, 115.4, 116.2, 118.3, 122.4, 127.1, 128.5, 128.8, 129.2, 131.4, 135.8, 143.3, 163.1, 165.7, 172.0; ESI-MS:  $m/z$  516.1593 [M+Na]<sup>+</sup>,  $m/z$  526.1326 [M+H+MeOH]<sup>+</sup>

**(E)-Ethyl 2-(2-(4-(1-methoxy-1-oxo-3-phenylpropan-2-ylcarbamoyl)phenyl)hydrazono)-3-oxo-3-phenylpropanoate (1j).** Yellow brown semi solid; Yield: 0.18 g; 61 %; FT-IR (KBr, neat, cm<sup>-1</sup>): 3364, 3022, 2952, 2360, 1744, 1653, 1609, 1526, 1230, 1173, 1016, 904, 849, 764, 699; <sup>1</sup>H NMR (400 MHz, CDCl<sub>3</sub>:  $\delta$  (ppm) 1.33 (3H, t,  $J$  = 7.2 Hz), 3.17-3.29 (2H, m), 3.74 (3H, s), 4.35 (2H, q,  $J$  = 7.2 Hz), 5.05 (1H, q,  $J$  = 5.6 & 6.0 Hz), 6.61 (1NH, d,  $J$  = 7.2 Hz), 7.11-7.29 (8H, m), 7.41-7.76 (5H, m), 7.93 (2H, t,  $J$  = 8.8 Hz), 12.66 (keto form) & 13.26 (enol form) (1H, s); <sup>13</sup>C NMR (100 MHz, CDCl<sub>3</sub>:  $\delta$  (ppm) 13.9, 37.8, 52.3, 53.6, 61.6, 114.8, 127.1, 128.1, 128.1, 128.3, 128.5, 128.7, 129.2, 129.2, 130.2, 132.7, 136.0, 137.2, 144.6, 163.5, 166.0, 172.1, 189.2; ESI-MS:  $m/z$  524.1378 [M+Na]<sup>+</sup>

**(E)-dimethyl 2-(4-(2-(1-ethoxy-1,3-dioxobutan-2-ylidene)hydrazinyl)benzamido)succinate (1k).** Yellow solid; Yield: 0.2 g; 67 %; m.p. 117-118 °C; FT-IR (KBr, neat, cm<sup>-1</sup>): 3287, 3096, 2985, 2952, 2361, 1730, 1633, 1520, 1437, 1368, 1306, 1268, 1167, 1088, 1014, 850, 768, 679; <sup>1</sup>H NMR (400 MHz, CDCl<sub>3</sub>:  $\delta$  (ppm) 1.32 (3H, q,  $J$  = 6.8 Hz), 2.43 (keto) & 2.52 (enol) (3H, s), 2.88-3.09 (2H, m), 3.63 (3H, s), 3.72 (3H, s), 4.25-4.32 (2H, m), 4.99 (1H, t,  $J$  = 4.8 & 2.8 Hz), 7.22 (2H, q,  $J$  = 4.8 & 1.2 Hz), 7.30 (2H, d,  $J$  = 8.8 Hz), 7.37 (1H, d,  $J$  = 8.8 Hz), 7.72-7.80 (2H, m), 12.61 (keto) & 14.53 (enol form) (1H, s); <sup>13</sup>C NMR (100 MHz, CDCl<sub>3</sub>:  $\delta$  (ppm) 13.1, 13.2, 13.3, 25.8, 29.7, 35.1, 35.1, 48.0, 48.0, 51.1, 51.8, 51.9, 60.2, 60.6, 61.9, 113.2, 114.1, 115.0, 116.5, 126.2, 126.8, 127.7, 127.9, 127.9, 128.0, 128.5, 129.2, 143.5, 143.6, 143.8, 158.5, 162.4, 163.6, 165.1, 170.3, 170.4, 170.7, 193.3, 196.2; ESI-MS:  $m/z$  444.2162 [M+Na]<sup>+</sup>

**(E)-Dimethyl 2-(4-(2-(1-methoxy-1,3-dioxobutan-2-ylidene)hydrazinyl)benzamido)succinate (1l).** Yellow semi solid; Yield: 0.19 g; 60 %; FT-IR (KBr, neat, cm<sup>-1</sup>): 3284, 3002, 2954, 2361, 1739, 1639, 1525, 1436, 1333, 1305, 1205, 1169, 1083, 1009, 850, 767; <sup>1</sup>H NMR (400 MHz, CDCl<sub>3</sub>:  $\delta$  (ppm) 2.43 (keto) & 2.52 (enol) (3H, s), 2.88-3.08 (2H, m), 3.63 (3H, s), 3.72 (3H, s), 3.82 (3H, s), 4.97-5.00 (1H, m), 6.84 (1H, d,  $J$  = 8.0 Hz), 7.23-7.39 (3H, m), 7.78 (1H, t,  $J$  = 8.4 Hz), 12.65 (keto) & 14.58 (enol form) (1H, s); <sup>13</sup>C NMR (100 MHz, CDCl<sub>3</sub>:  $\delta$  (ppm) 25.7, 29.7, 35.1, 48.0, 51.0, 51.2, 51.2, 51.8, 51.9, 52.1, 52.6, 113.3, 114.3, 114.5, 115.1, 116.0, 123.8, 125.8, 126.7, 127.2, 127.9, 128.0, 128.2, 128.6, 129.2, 143.4, 143.5, 143.9, 159.0, 159.6, 162.8, 164.0, 165.2, 165.4, 165.8, 169.4, 170.3, 170.4, 170.5, 170.6, 170.6, 170.7, 193.4, 196.2; ESI-MS:  $m/z$  430.1750 [M+Na]<sup>+</sup>

**(E)-Dimethyl 2-(4-(2-(1-isobutoxy-1,3-dioxobutan-2-ylidene)hydrazinyl)benzamido)succinate (1m).** Yellow semi solid; Yield: 0.17 g; 59 %; FT-IR (KBr, neat, cm<sup>-1</sup>): 3296, 2962, 2361, 1734, 1637, 1525, 1438, 1304, 1262, 1171, 1086, 1020, 850, 801, 766, 671; <sup>1</sup>H NMR (400 MHz, CDCl<sub>3</sub>:  $\delta$  (ppm) 0.92-0.97 (6H, m), 1.98-2.00 (1H, m), 2.42 (keto, d,  $J$  = 2.0 Hz) & 2.51 (enol, t,  $J$  = 2.4 Hz) (3H combined), 2.92 (1H, dd,  $J$  = 2.0 Hz), 3.04 (1H, dd,  $J$  = 3.6 Hz), 3.62 (3H, s), 3.71 (3H, s), 3.98-4.02 (2H, m), 4.98 (1H, t,  $J$  = 3.6 & 2.8 Hz), 7.28-7.37 (2H, m), 7.76-7.79 (2H, m), 12.55 (keto) & 14.51 (enol form) (1H, s); <sup>13</sup>C NMR (100 MHz, CDCl<sub>3</sub>:  $\delta$  (ppm) 18.0, 18.2, 25.7, 26.7, 26.9, 29.6, 35.1, 48.1, 51.0, 51.8, 70.1, 70.4, 114.1, 114.9, 126.1, 127.8, 127.9, 128.0, 128.4, 129.2, 143.5, 143.7, 162.4, 163.6, 165.1, 170.3, 170.3, 170.6, 193.0, 196.1; ESI-MS:  $m/z$  472.3123 [M+Na]<sup>+</sup>

**Dimethyl 2-(4-((E)-((E)-1-ethoxy-4,4,4-trifluoro-3-hydroxy-1-oxobut-2-en-2-yl)diazenyl)benzamido)succinate (1n).** Yellow solid; Yield: 0.17 g; 58 %; m.p. 121-122 °C; FT-IR (KBr, neat, cm<sup>-1</sup>): 3331, 3164, 2960, 2360, 1743, 1642, 1527, 1443, 1353, 1247, 1050, 1018, 913, 855, 805, 768, 726, 640; <sup>1</sup>H NMR (400 MHz, CDCl<sub>3</sub>:  $\delta$  (ppm) 1.43 (3H, t,  $J$  = 6.8 & 7.2 Hz), 2.98 (1H, dd,  $J$  = 4.4 Hz), 3.15 (1H, dd,  $J$  = 4.4 Hz), 3.72 (3H, s), 3.81 (3H, s), 4.43 (2H, q,  $J$  = 7.2 Hz), 5.04-5.08 (1H, m), 7.23 (1NH, d,  $J$  = 7.6 Hz), 7.47 (2H, d,  $J$  = 8.8 Hz), 7.91 (2H, d,  $J$  = 8.8 Hz), 13.42 (enol form) (1OH, s); <sup>13</sup>C NMR (100 MHz, CDCl<sub>3</sub>:  $\delta$  (ppm) 14.1, 36.1, 49.1, 52.2, 53.0, 62.3, 116.4, 122.6, 129.2, 131.3, 143.6, 163.4, 165.9, 171.2, 171.8; ESI-MS:  $m/z$  498.3548 [M+Na]<sup>+</sup>,  $m/z$  508.2682 [M+H+MeOH]<sup>+</sup>

**(E)-Dimethyl 2-(4-(2-(1-ethoxy-1,3-dioxo-3-phenylpropan-2-ylidene)hydrazinyl)benzamido)succinate (1o).** Yellow brown semi solid; Yield: 0.18 g; 60 %; FT-IR (KBr, neat, cm<sup>-1</sup>): 3381, 2954, 2926, 2360, 1741, 1659, 1609, 1529, 1439, 1231, 1174, 1017, 903, 851, 765, 718, 693, 669; <sup>1</sup>H NMR (400 MHz, CDCl<sub>3</sub>:  $\delta$  (ppm) 1.35 (3H, t,  $J$  = 7.2 Hz), 2.97 (1H, dd,  $J$  = 4.8 & 4.4 Hz), 3.13 (1H, dd,  $J$  = 4.0 & 4.4 Hz), 3.70 (3H, s), 3.79 (3H, s), 4.38 (2H, q,  $J$  = 7.2 Hz), 5.02-5.07 (1H, m), 7.15 (1NH, d,  $J$  = 8.0 Hz), 7.21 (2H, d,  $J$  = 8.8 Hz), 7.46-7.68 (3H, m), 7.78 (2H, d,  $J$  = 8.4 Hz), 7.94 (2H, d,  $J$  = 8.4 Hz), 12.68 (keto form) & 13.35 (enol form) (1H, s); <sup>13</sup>C NMR (100 MHz, CDCl<sub>3</sub>:  $\delta$  (ppm) 13.9, 36.0, 48.9, 52.0, 52.8, 61.6, 114.9, 115.6, 127.8, 128.1, 128.1, 128.3, 128.9, 130.3, 132.7, 137.2, 144.8, 163.6, 166.0, 171.2, 171.7, 189.2, ; ESI-MS:  $m/z$  506.4102 [M+Na]<sup>+</sup>

**$^1\text{H}$  &  $^{13}\text{C}$ -NMR of Methyl 2-(4-aminobenzamido)-3-methylpentanoate (2):**

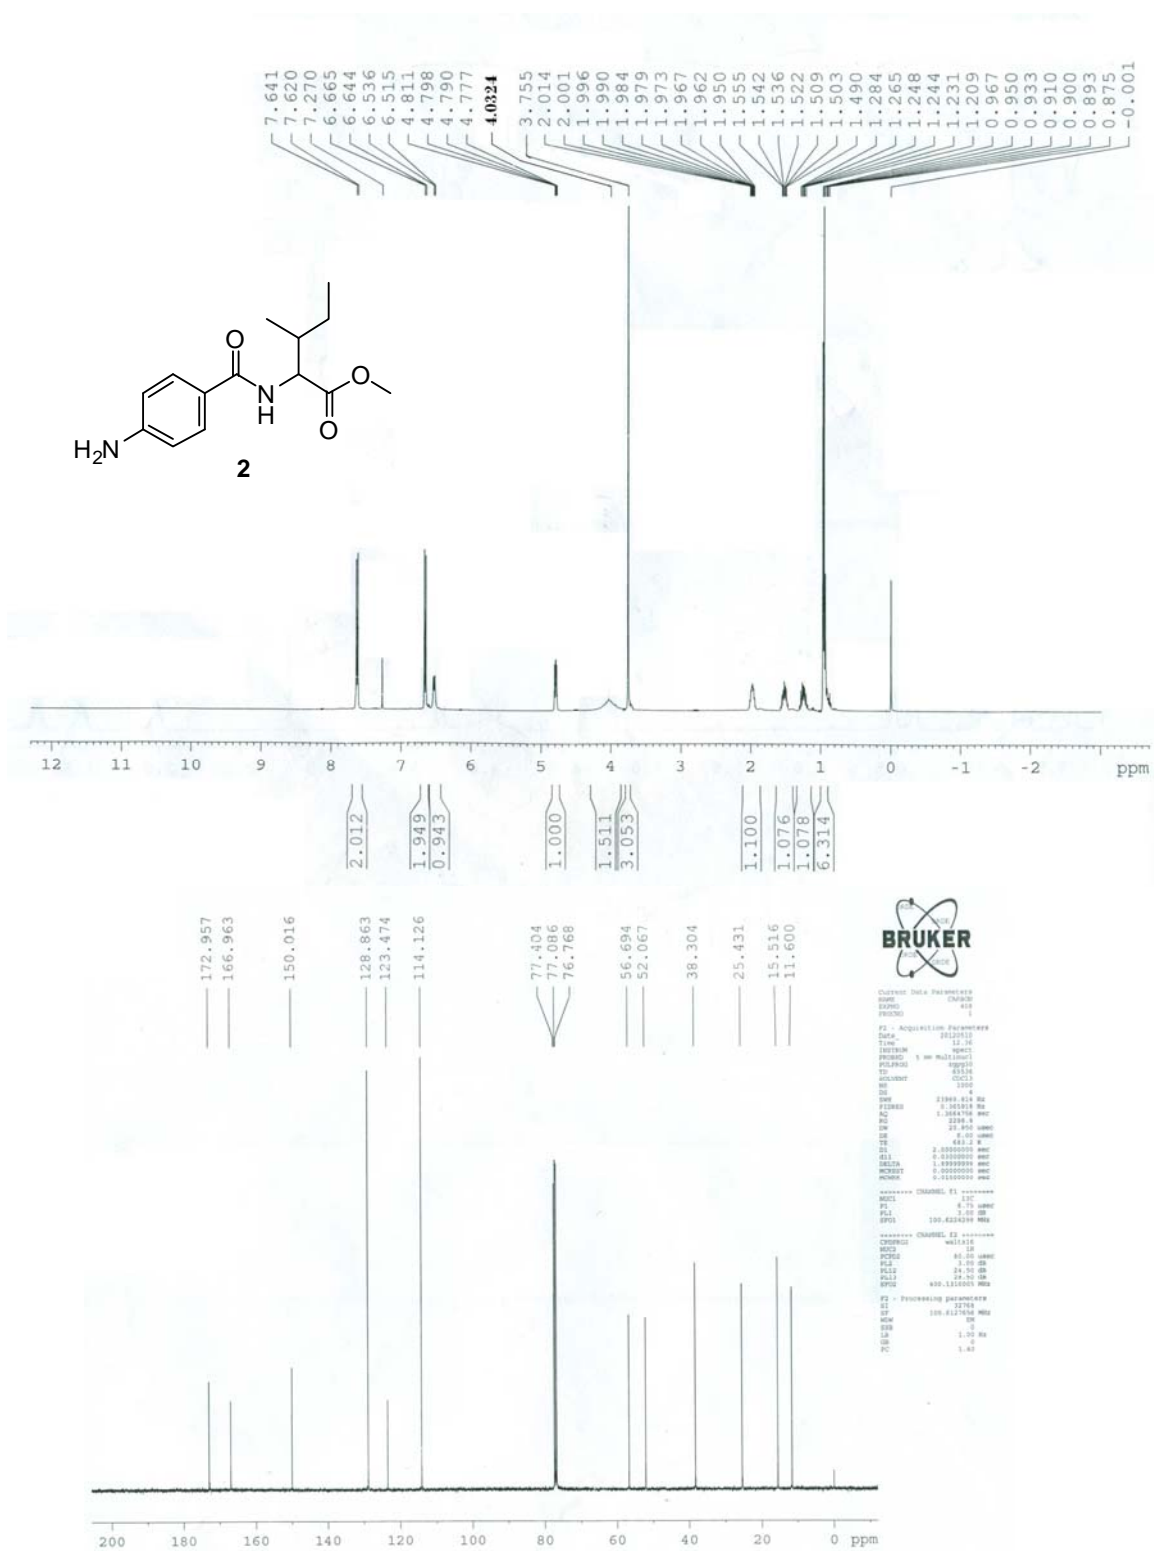

<sup>1</sup>H & <sup>13</sup>C-NMR of (E)-4-(2-(1-ethoxy-1,3-dioxobutan-2-ylidene)hydrazinyl) benzoic acid (3a)

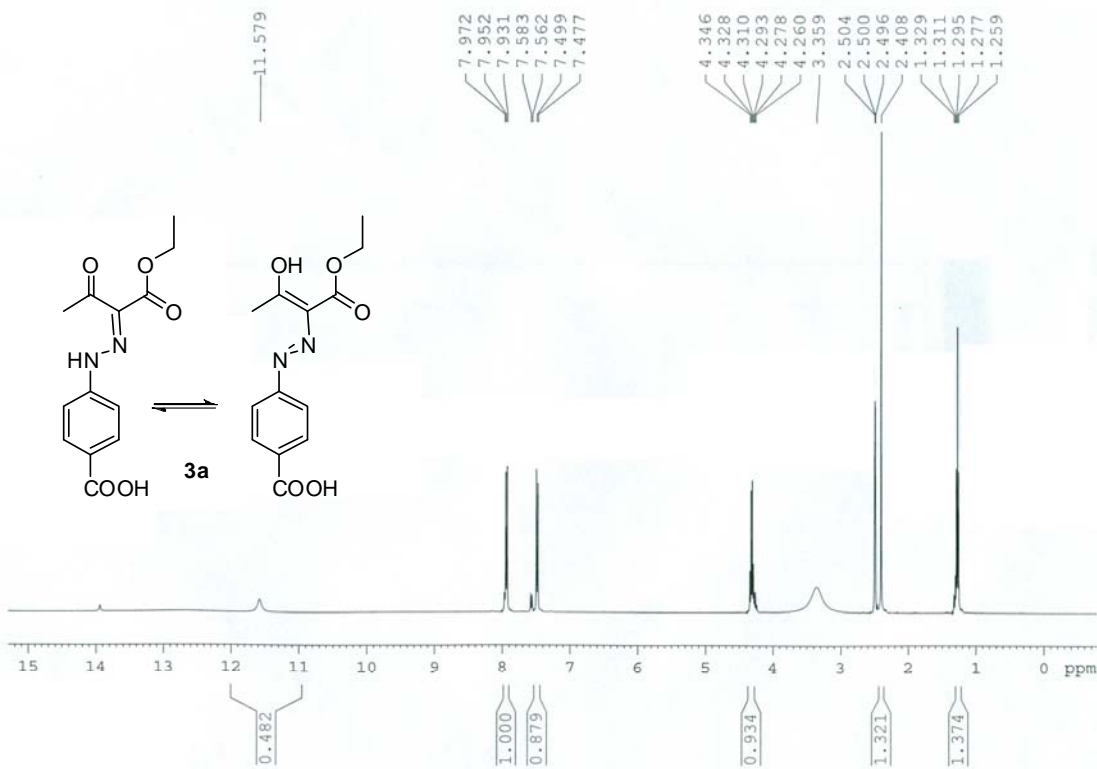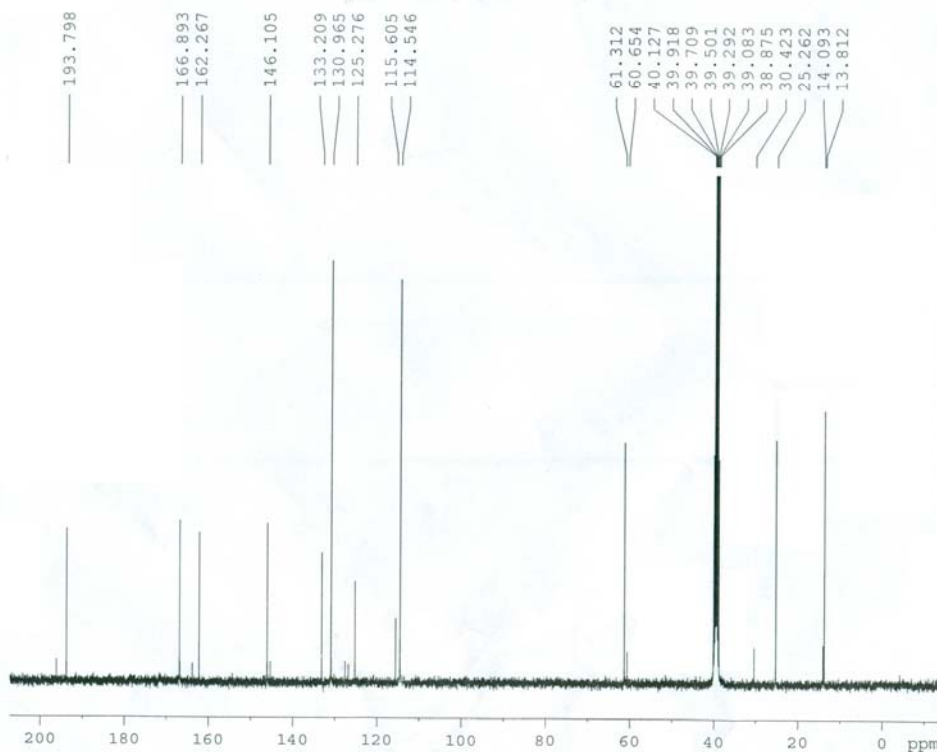

**<sup>1</sup>H & <sup>13</sup>C-NMR of (E)-4-(2-(1-methoxy-1,3-dioxobutan-2-ylidene)hydrazinyl)benzoic acid (3b)**

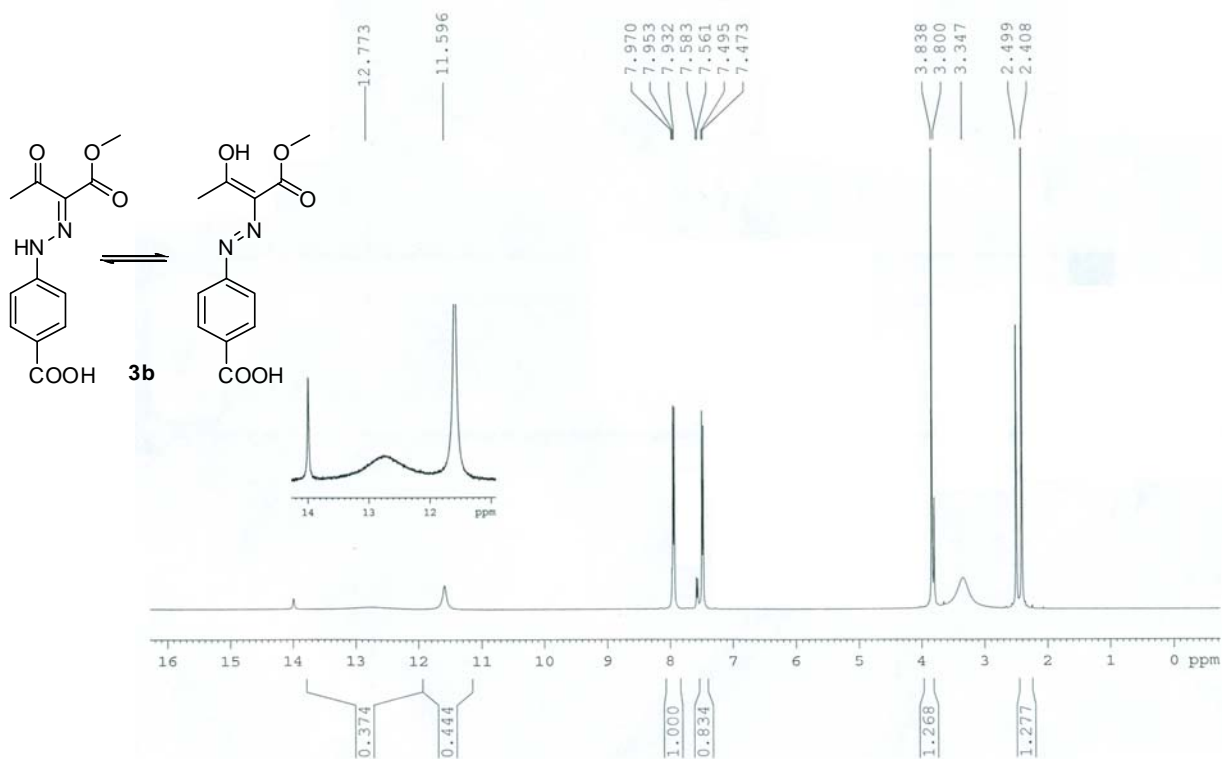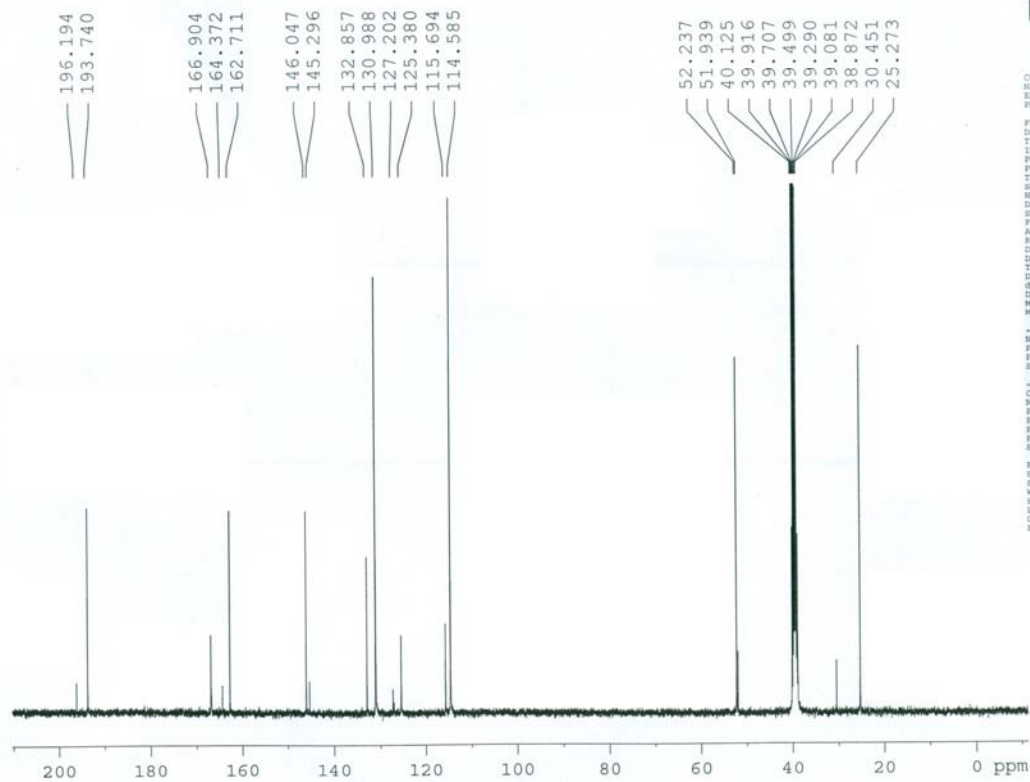

<sup>1</sup>H & <sup>13</sup>C-NMR of (E)-4-(2-(1-isobutoxy-1,3-dioxobutan-2-ylidene)hydrazinyl)benzoic acid (3c)

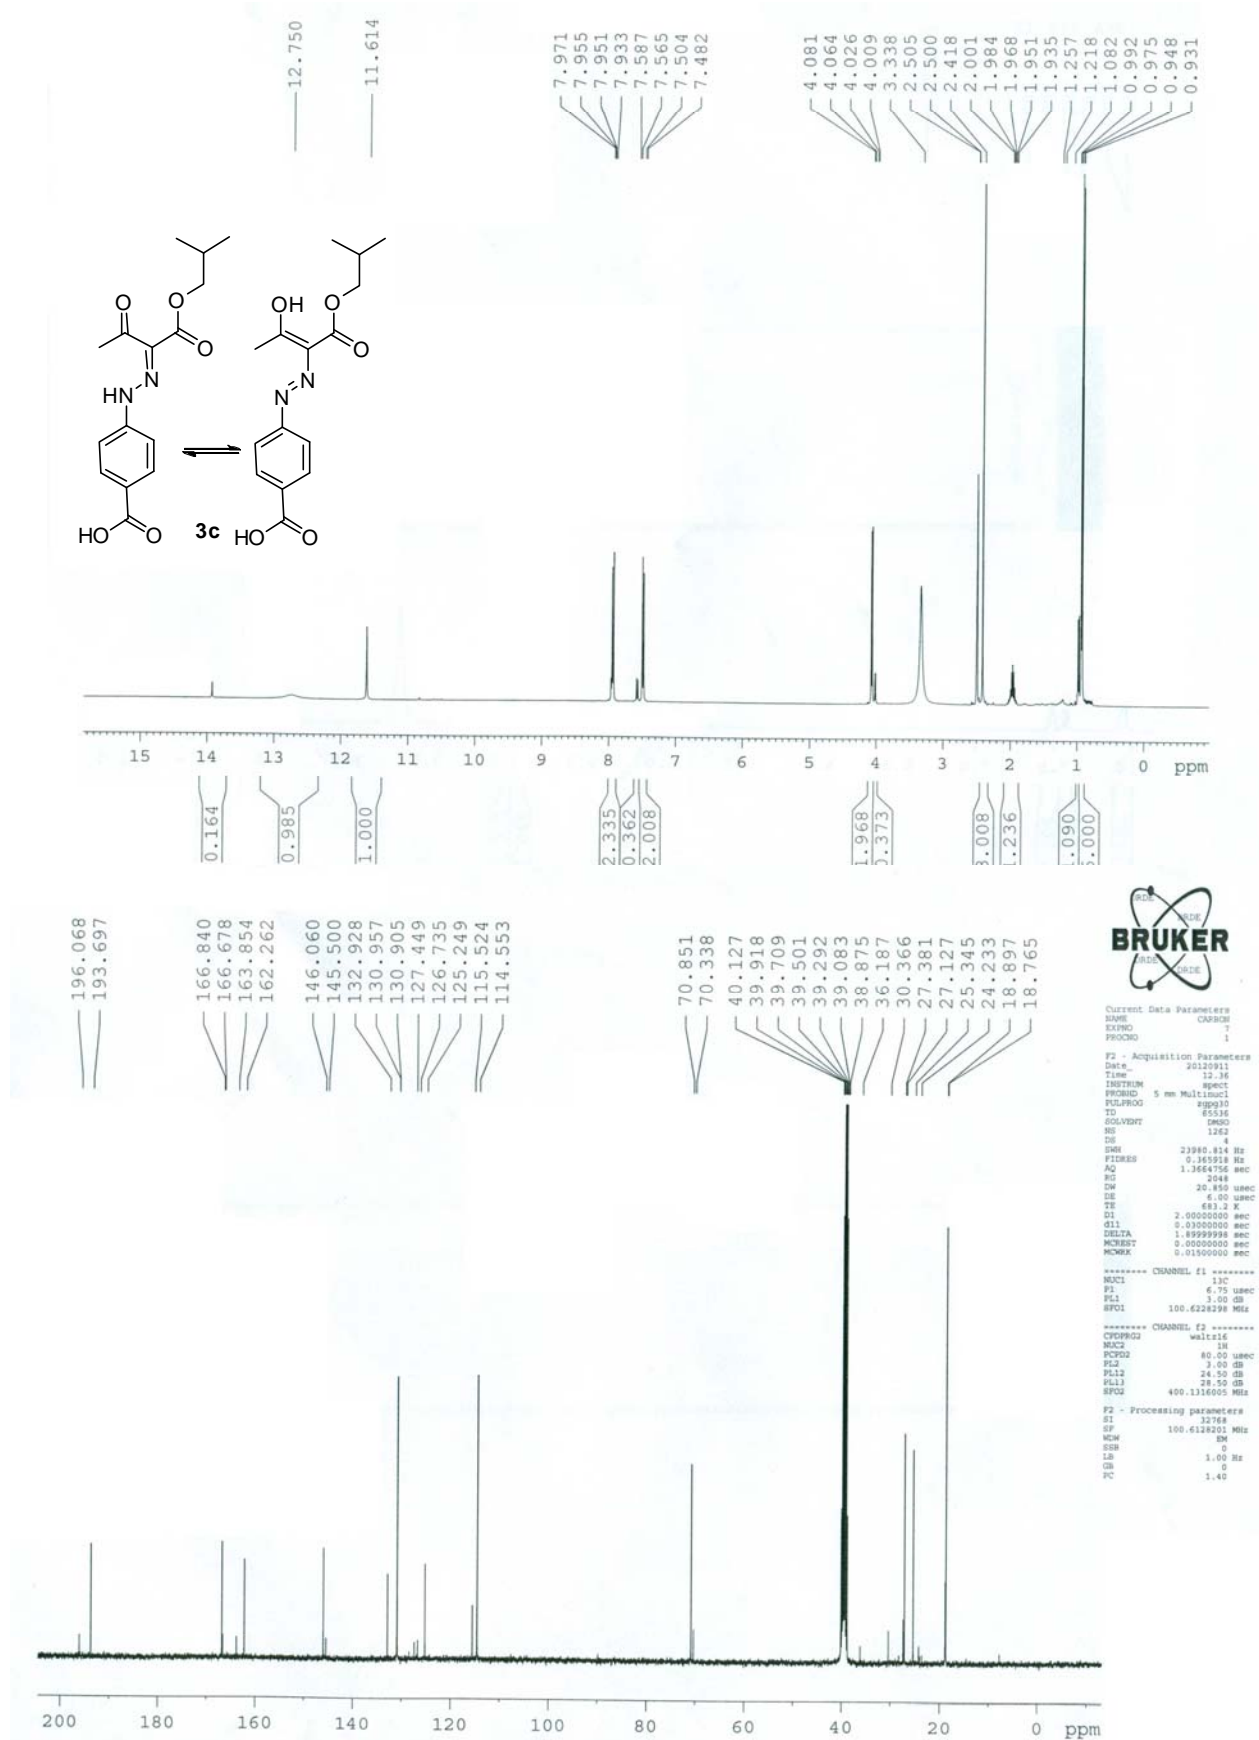



<sup>1</sup>H & <sup>13</sup>C-NMR of 4-((Z)-((Z)-1-ethoxy-4,4,4-trifluoro-3-hydroxy-1-oxobut-2-en-2-yl) diazenyl)benzoic acid (3d)

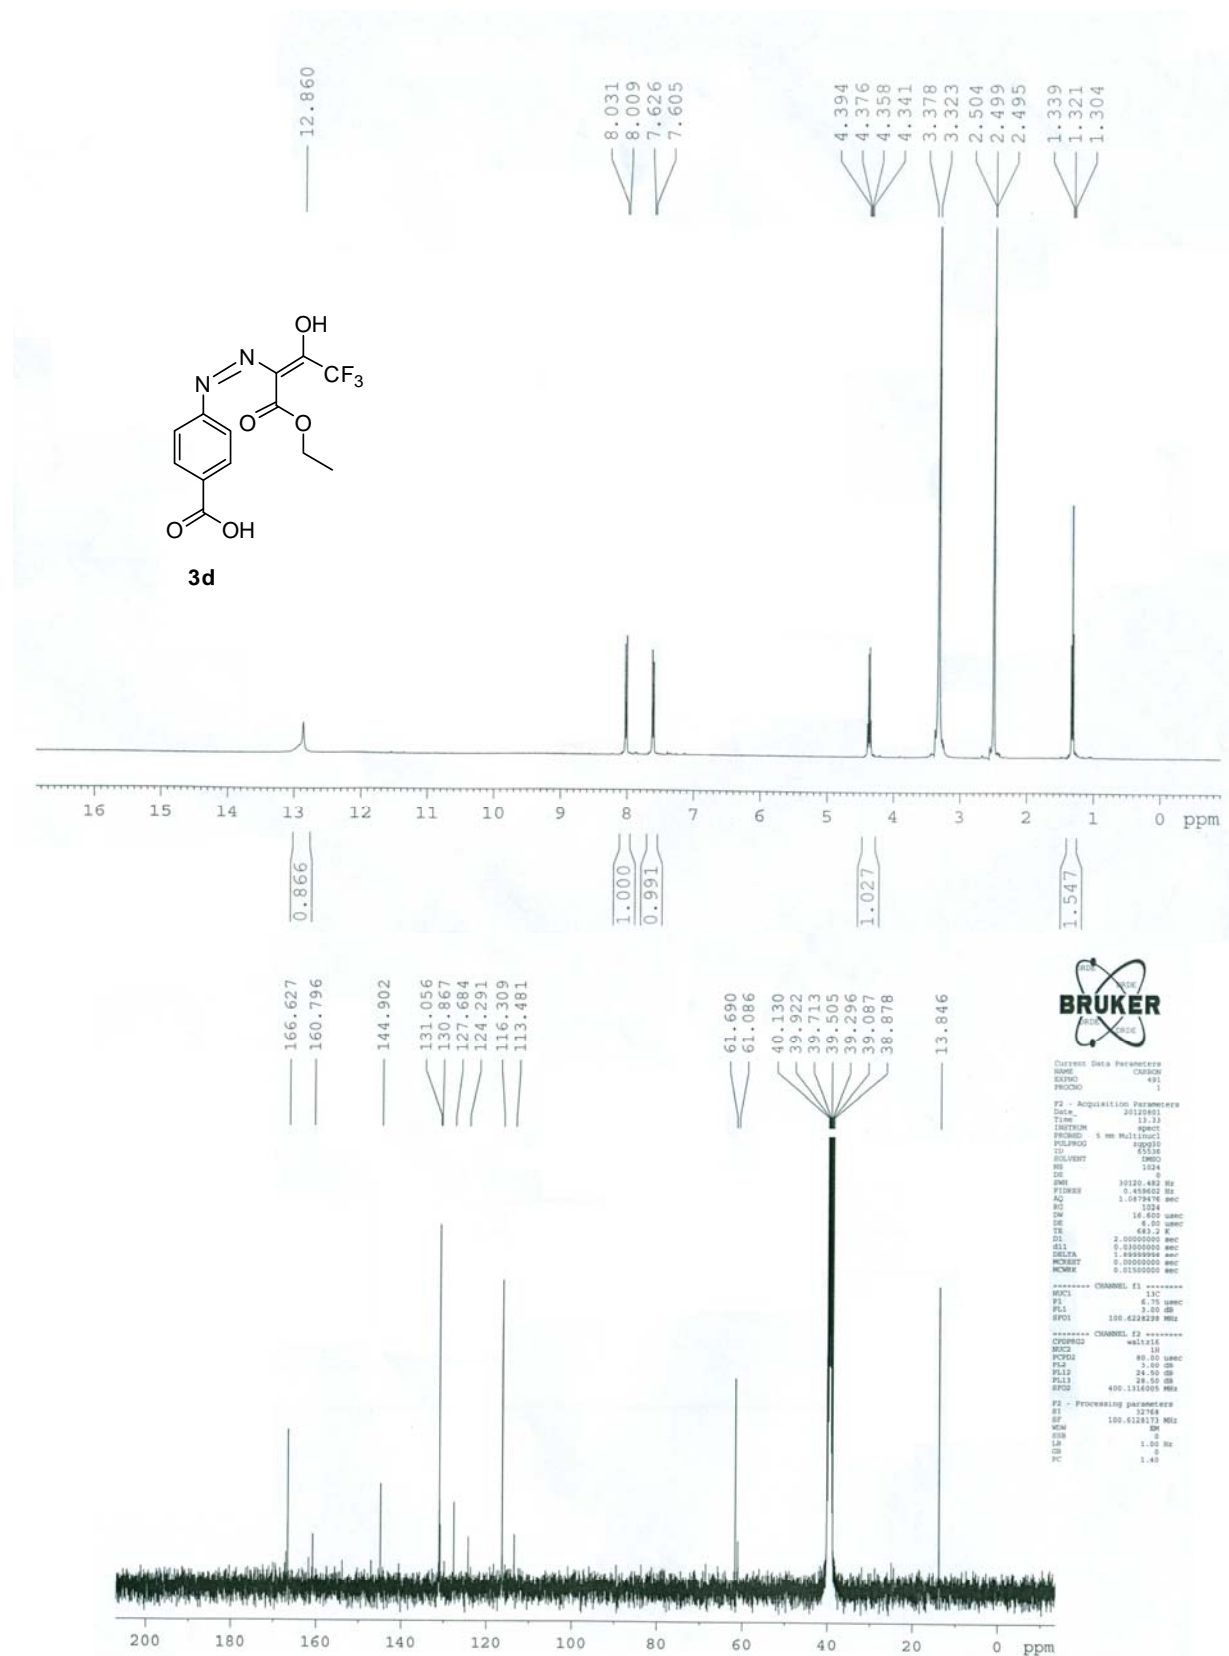

**(E)-4-(2-(1-ethoxy-1,3-dioxo-3-phenylpropan-2-ylidene)hydrazinyl)benzoic acid (3e)**

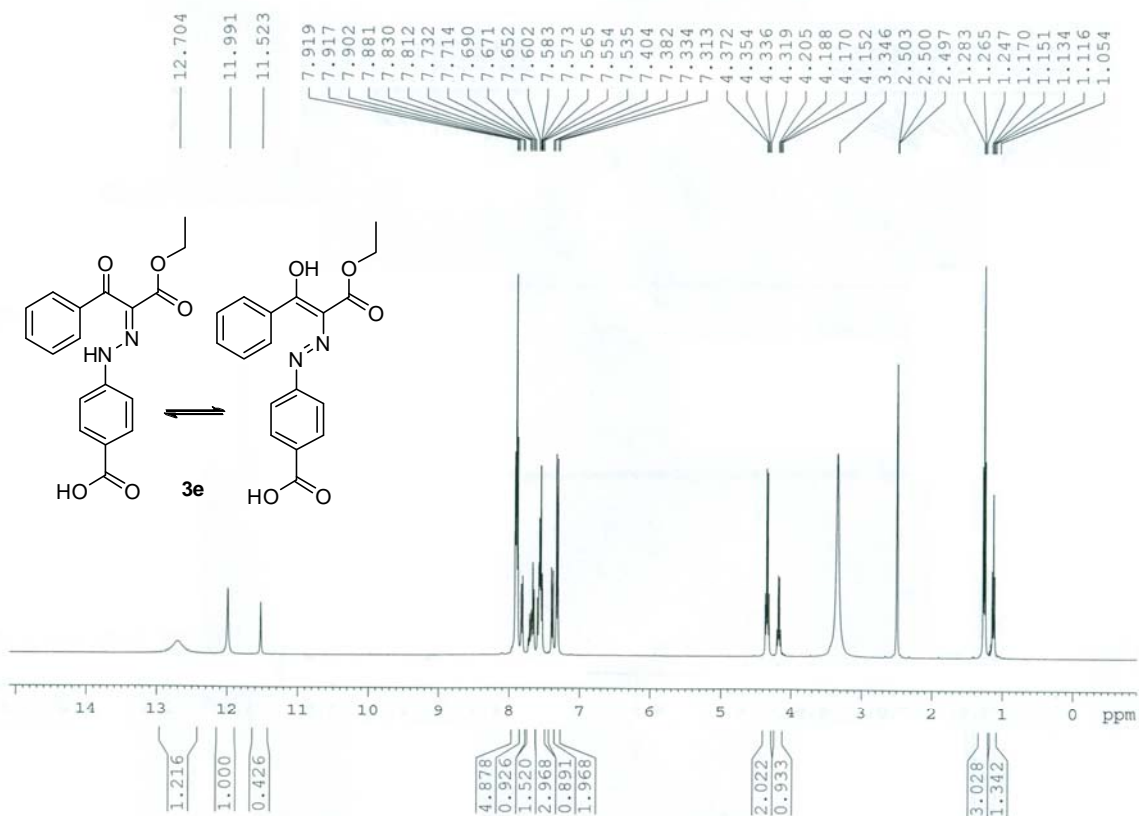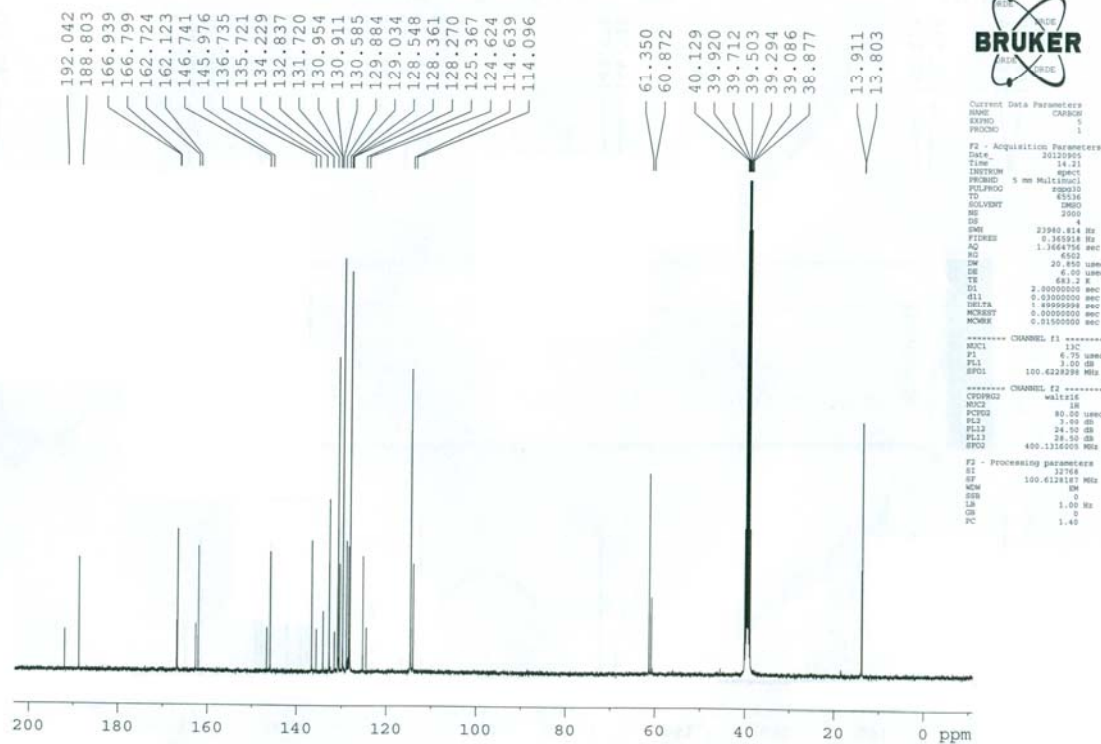

**BRUKER**

Current Data Parameters  
NAME CARBO  
EXPNO 1  
PROCNO 1

F2 - Acquisition Parameters  
Date\_ 20120925  
Time 15:21  
INSTRUM spect  
PROBHD 5 mm Multispec  
PULPROG zgpg30  
TD 65536  
SOLVENT DMSO  
NS 2048  
DS 4  
SFO 239.614 MHz  
FIDRES 0.365918 Hz  
AQ 1.164795 sec  
RG 652  
CW 20.800 usec  
DE 6.00 usec  
TE 300.2 K  
D1 2.9000000 sec  
d11 0.0300000 sec  
DELTA 1.8000000 sec  
INVRT 0.0000000 sec  
MORPH 0.0100000 sec

\*\*\*\*\* CHANNEL f1 \*\*\*\*\*  
NUC1 13C  
P1 6.75 usec  
PL1 2.00 dB  
SFO1 100.628187 MHz

\*\*\*\*\* CHANNEL f2 \*\*\*\*\*  
CPDPRG2 waltz16  
NUC2 1H  
PCPD2 80.00 usec  
PL2 2.00 dB  
PL12 24.50 dB  
PL13 24.50 dB  
SFO2 400.1316000 MHz

F2 - Processing parameters  
SI 32768  
SF 100.6128187 MHz  
WDW EM  
SSB 0  
LB 1.00 Hz  
GB 0  
PC 1.40

**(E)-Methyl 2-(4-(2-(1-ethoxy-1,3-dioxobut-an-2-ylidene)hydrazinyl)benzamido) -3-methylpentanoate (1a)**

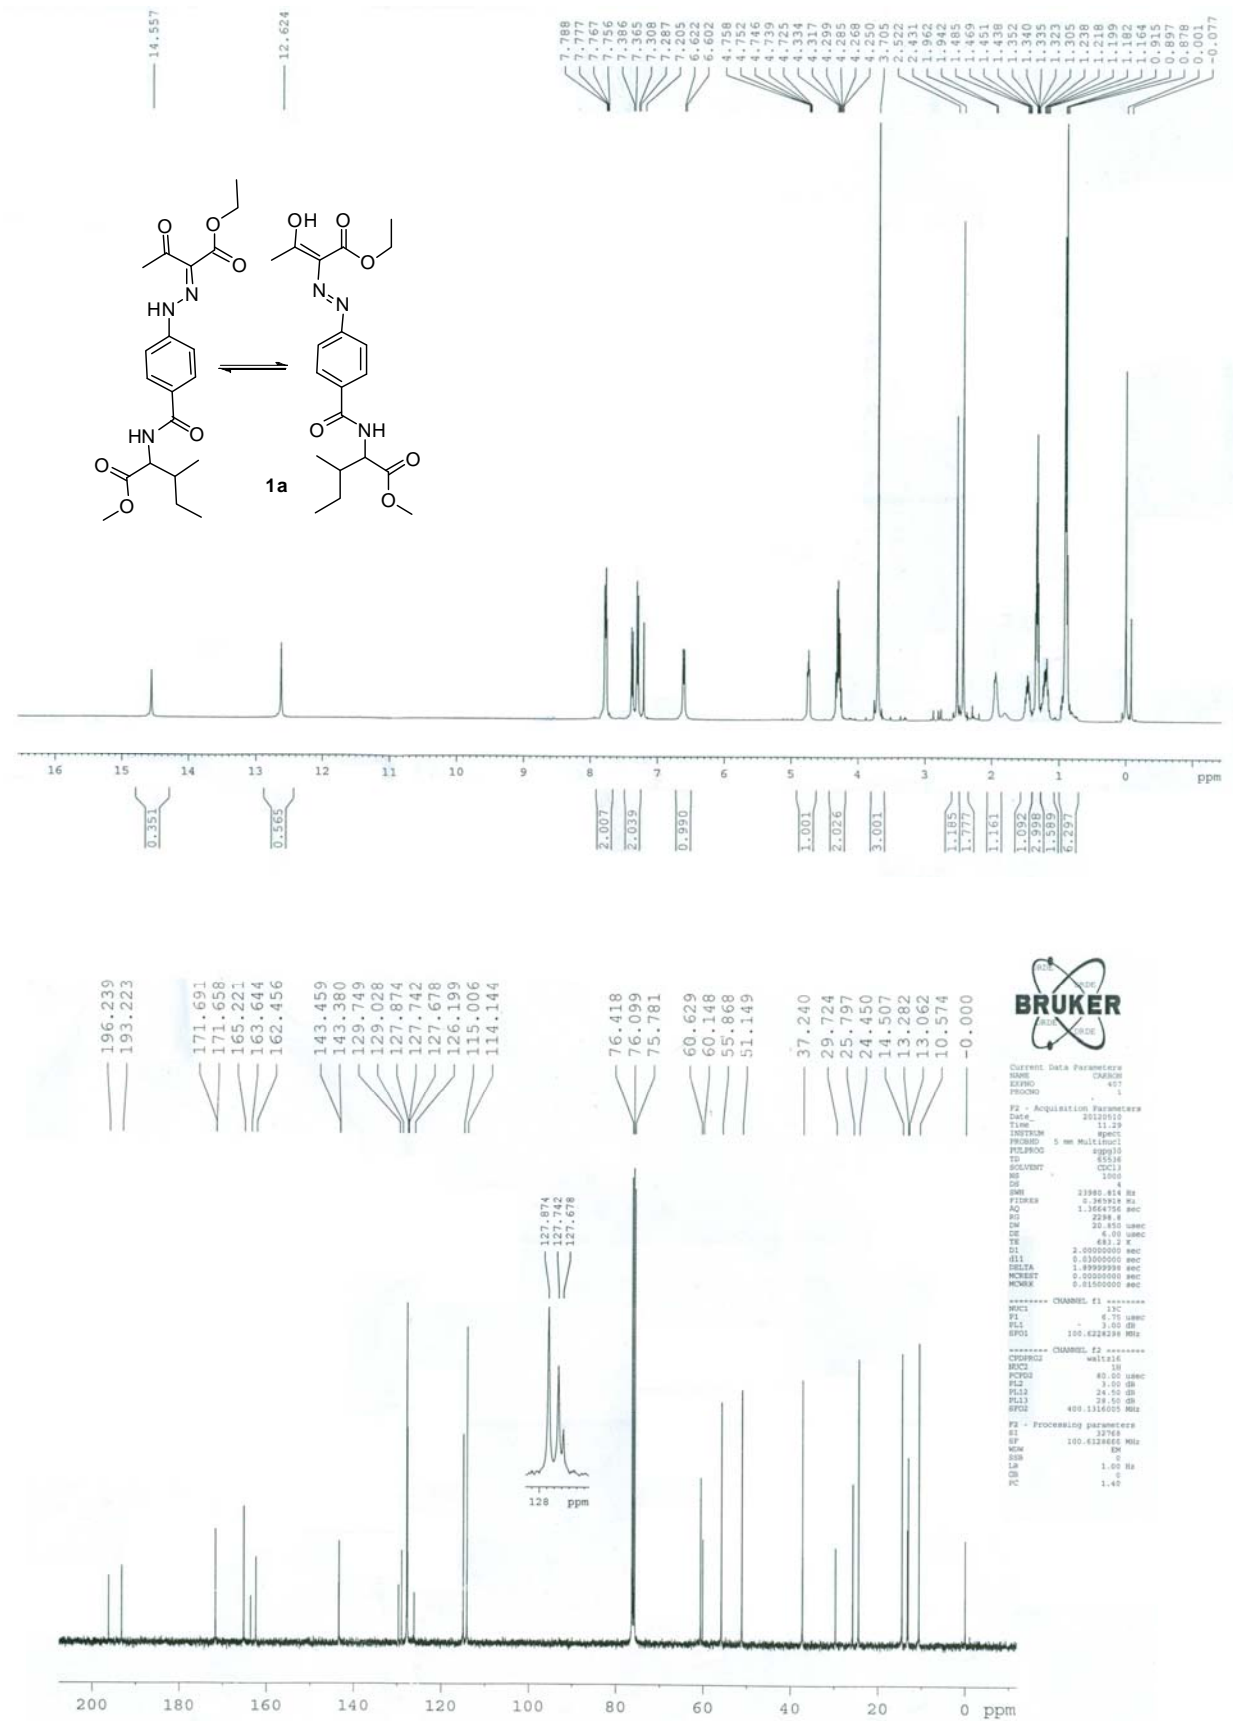

**(E)-Methyl 2-(4-(2-(1-methoxy-1,3-dioxobutan-2-ylidene)hydrazinyl) benzamido)-3-methylpentanoate (1b)**

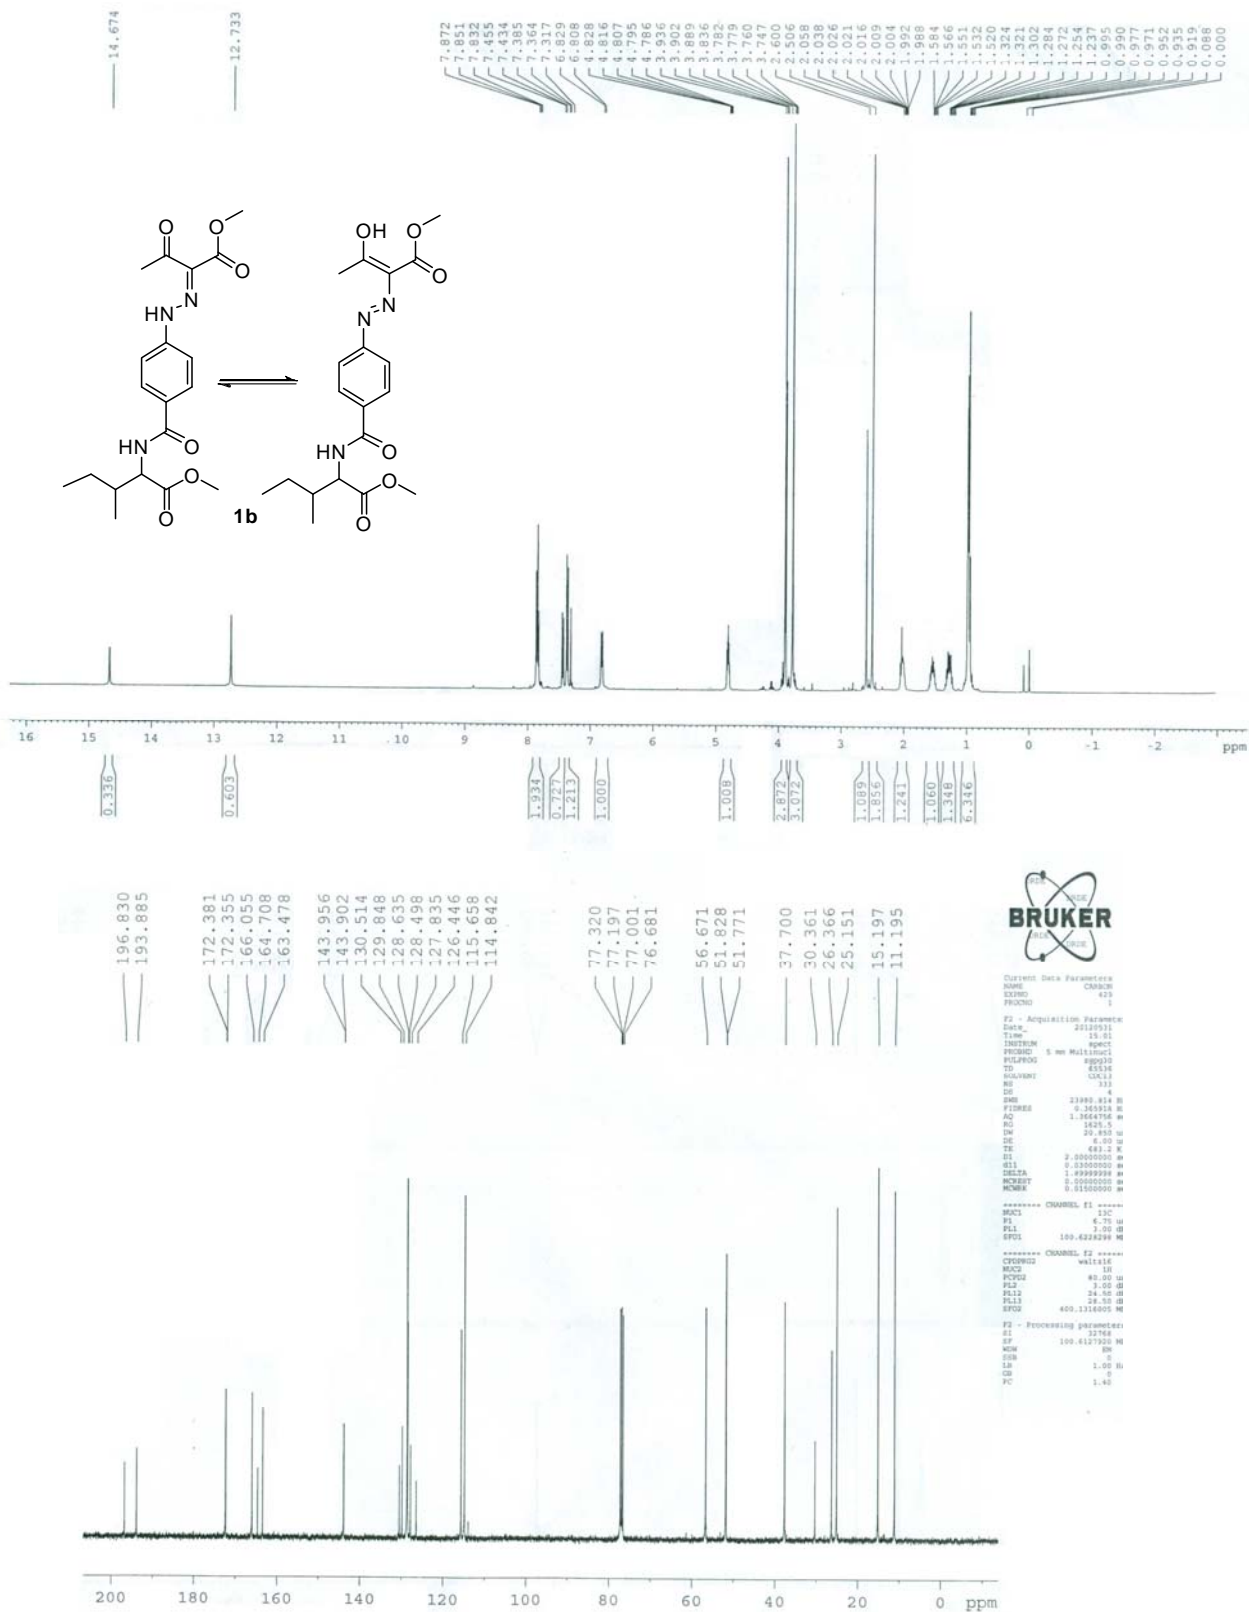

**(E)-Methyl 2-(4-(2-(1-isobutoxy-1,3-dioxobutan-2-ylidene)hydrazinyl)benzamido)-3-methylpentanoate (1c)**

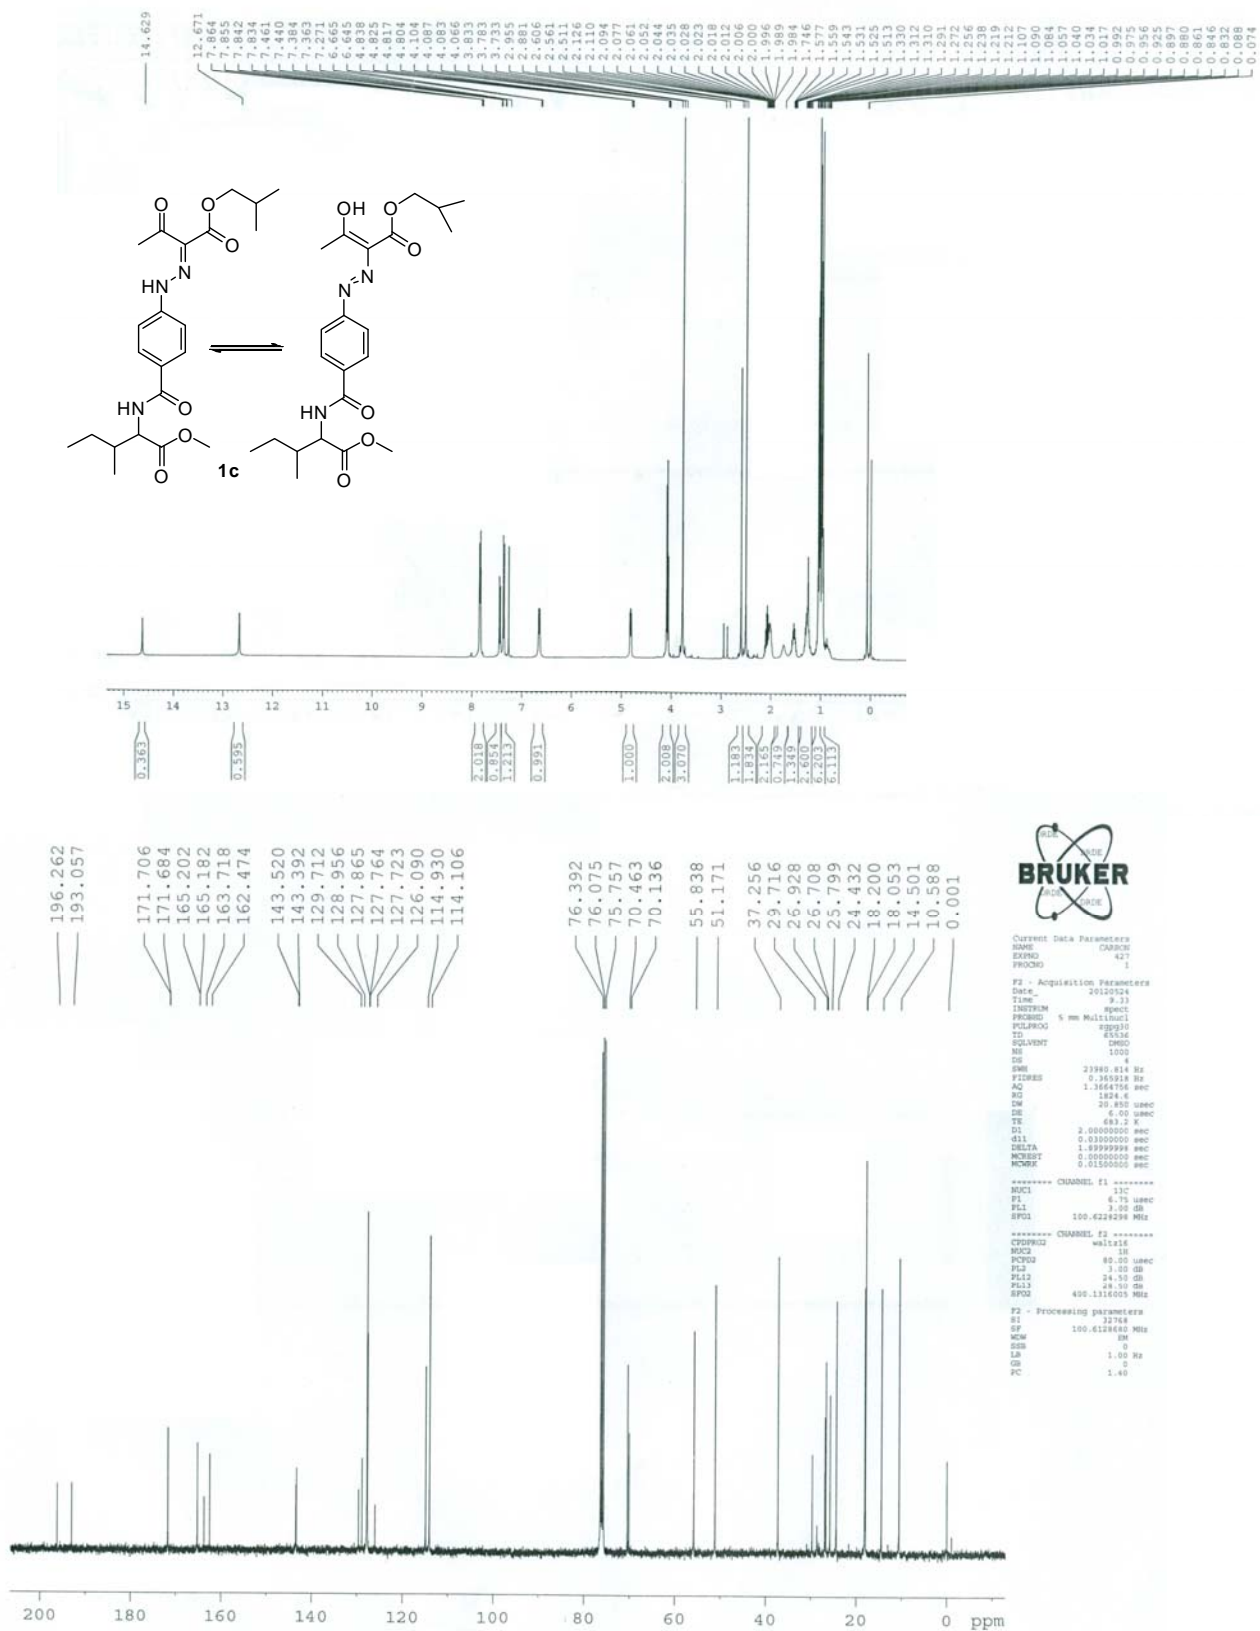

**Methyl 2-(4-((E)-(E)-1-ethoxy-4,4,4-trifluoro-3-hydroxy-1-oxobut-2-en-2-yl)diazenyl)benzamido)-3-methylpentanoate (1d)**

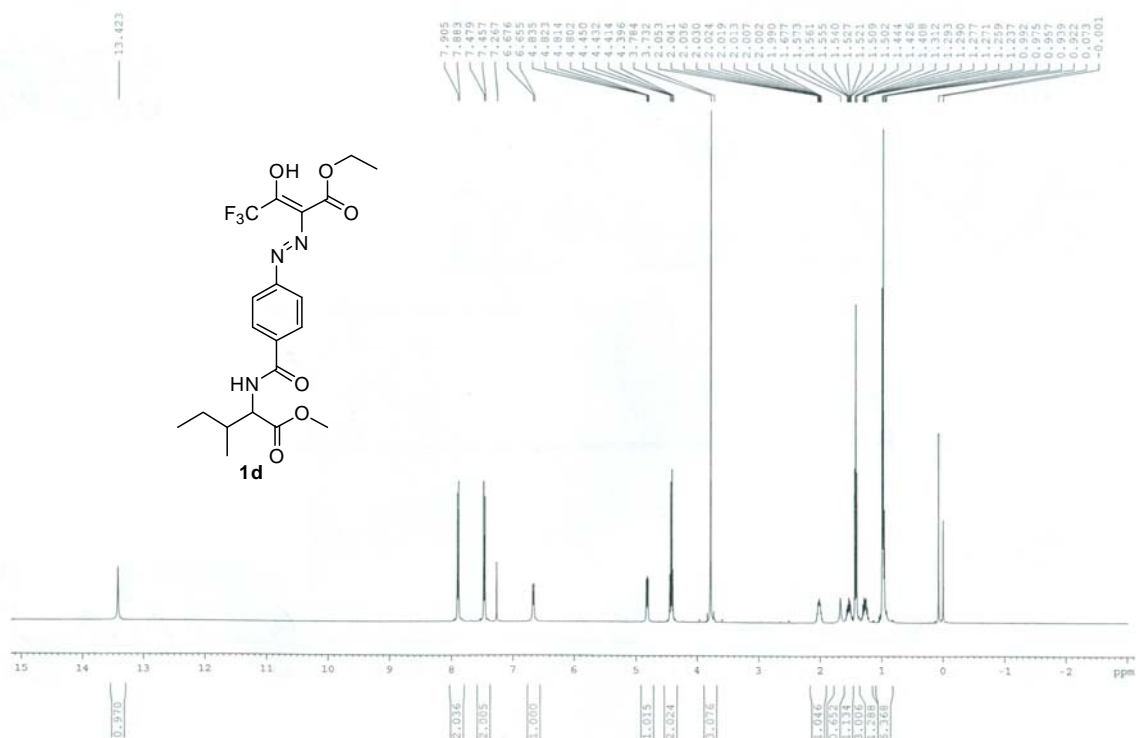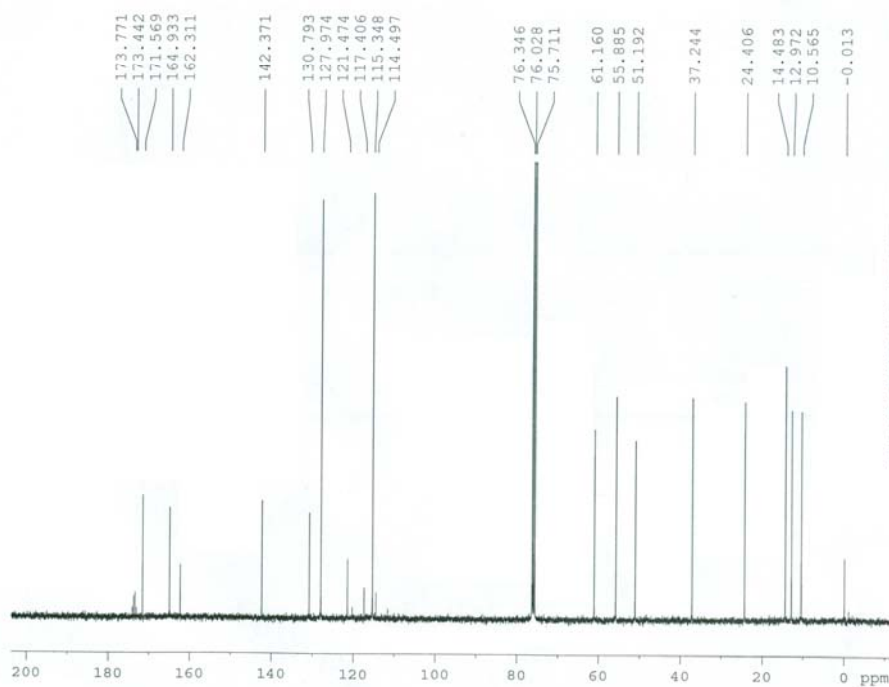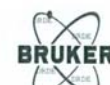

Current Data Parameters  
 NAME: C130001  
 EXPNO: 431  
 PROCNO: 1  
 F2 - Acquisition Parameters  
 Date\_: 20120808  
 TIME: 11.40  
 INSTRUM: spect  
 PROBHD: 5 mm Multispec  
 PULPROG: zgpg30  
 TD: 65536  
 SFO: 400.146  
 AQSVCNT: 1638  
 RG: 481  
 DS: 21982.814  
 FIDRES: 0.203918 Hz  
 AQ: 1.368476 Hz  
 RG2: 7298.2  
 SW: 20.850 MHz  
 DE: 6.30 MHz  
 TE: 300.2 K  
 SI: 2.00000000 mm  
 SFO2: 0.00000000 MHz  
 SFO3: 1.00000000 MHz  
 SFO4: 0.00000000 MHz  
 SFO5: 0.00000000 MHz  
 \*\*\*\*\* CHANNEL f1 \*\*\*\*\*  
 NUC1: 13C  
 P1: 6.70 us  
 PL1: 0.00 dB  
 SFO1: 100.628350 MHz  
 \*\*\*\*\* CHANNEL f2 \*\*\*\*\*  
 CPOBPG: waltz16  
 NUC2: 1H  
 PCPD2: 80.00 us  
 PL2: 0.00 dB  
 PL12: 24.10 dB  
 SFO2: 400.146000 MHz  
 F2 - Processing parameters  
 SI: 2.00000000 mm  
 SF: 100.628350 MHz  
 NCU: 0H  
 SW: 1.00 MHz  
 DS: 21982.814  
 PC: 1.40

**(E)-Methyl 2-(4-(2-(1-ethoxy-1,3-dioxo-3-phenylpropan-2-ylidene)hydrazinyl)benzamido)-3-methylpentanoate (1e)**

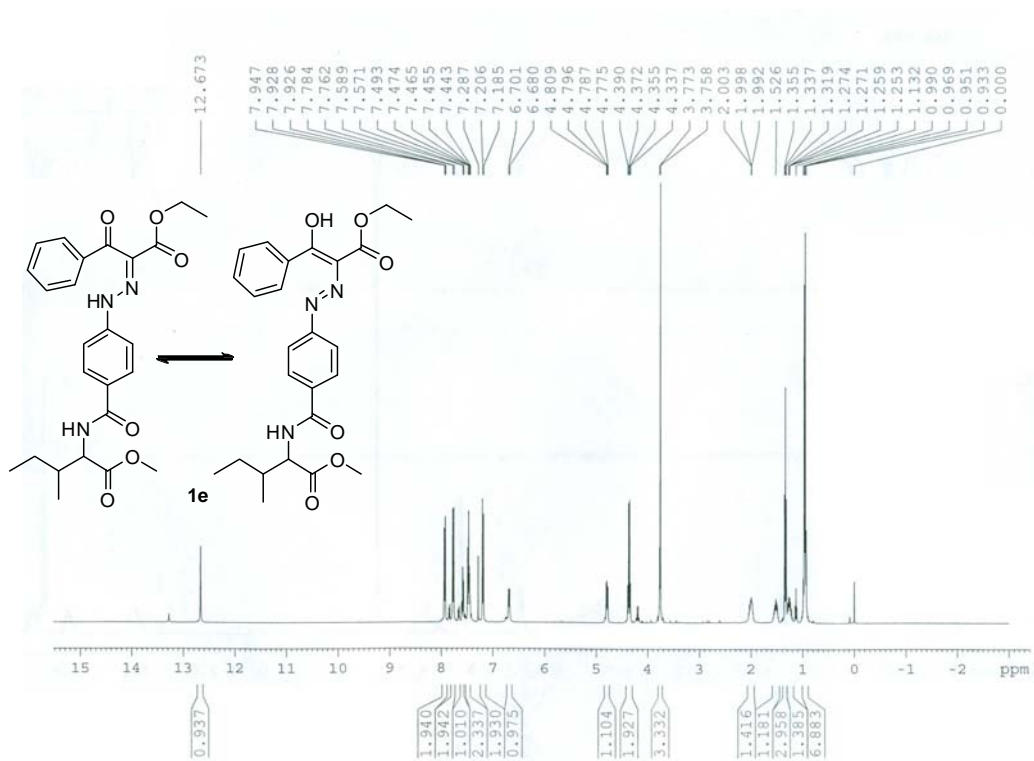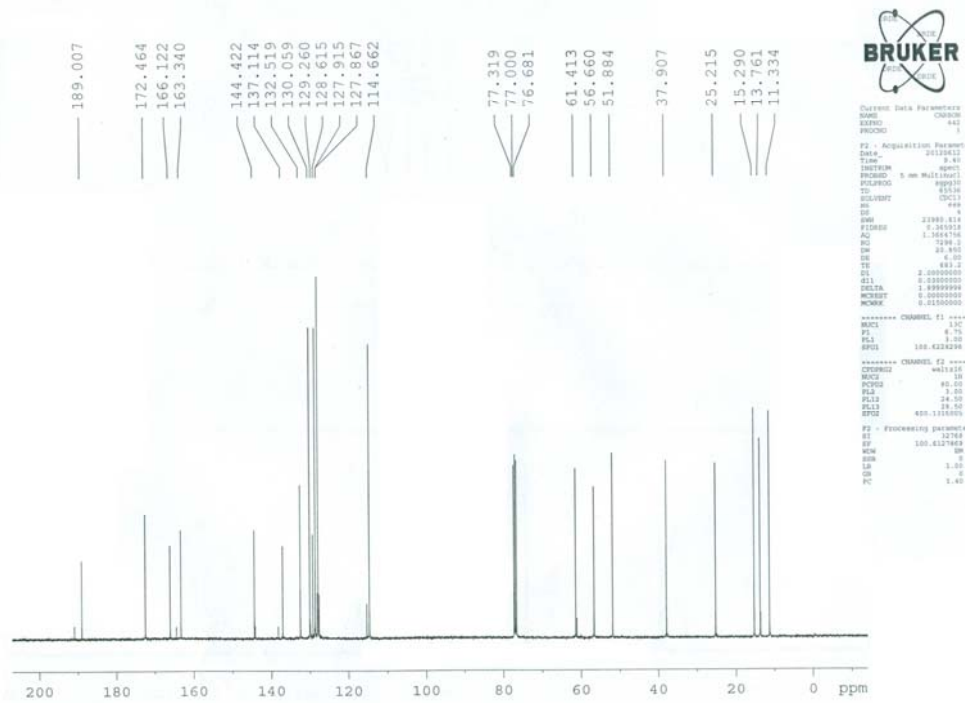

**(E)-Ethyl 2-(2-(4-(1-methoxy-1-oxo-3-phenylpropan-2-ylcarbamoyl)phenyl)hydrazono)-3-oxobutanoate (1f)**

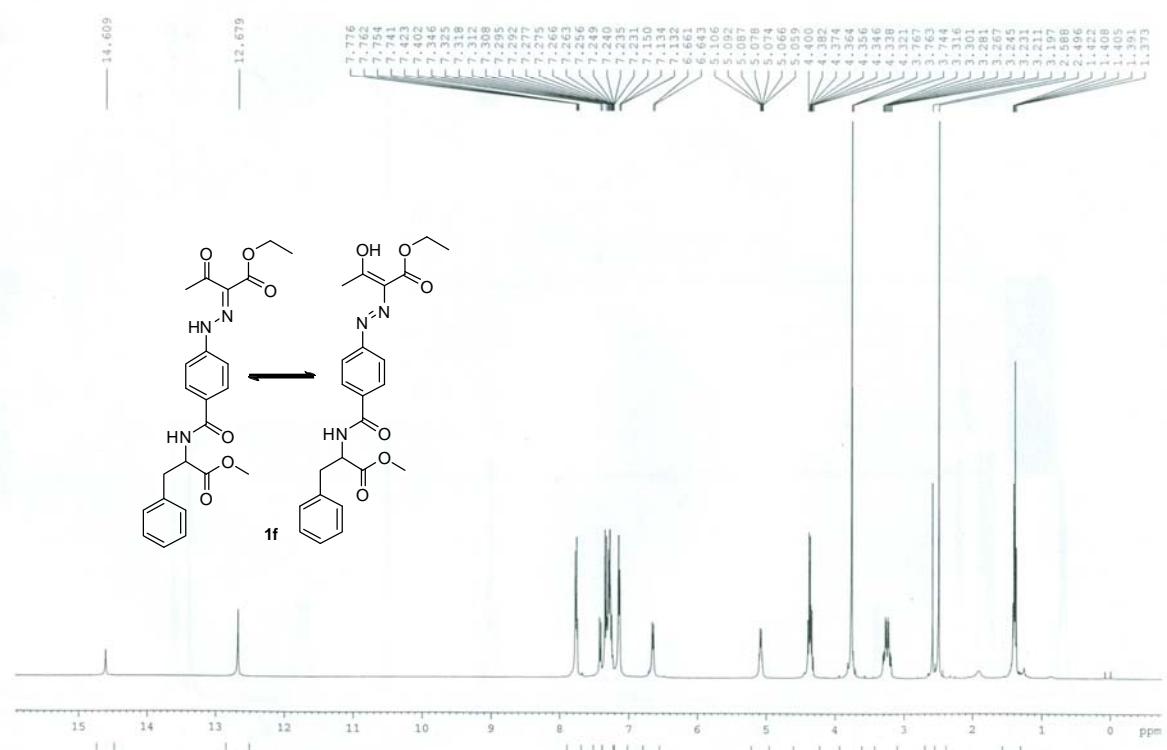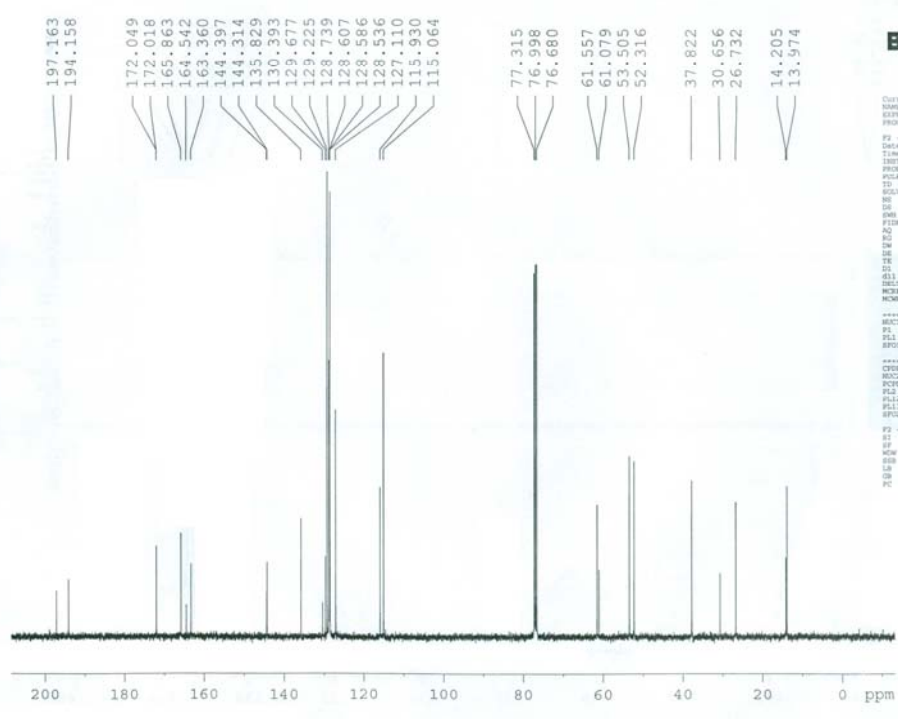

**BRUKER**

Current Data Parameters  
NAME: CHM02  
EXPNO: 1  
PROCNO: 1

F2 - Acquisition Parameters  
Date\_ : 201205  
Time : 12.02  
INSTRUM : spect  
PROBHD : 5 mm Multispec1  
PULPROG : zgpg30  
TD : 65536  
SOLVENT : CDCl3  
NS : 448  
DS : 4  
SWH : 23940.614 Hz  
FIDRES : 0.36939 Hz  
AQ : 1.366476 sec  
RG : 1633.5  
DM : 20.630 umsec  
DE : 6.00 umsec  
TE : 300.2 K  
DQ1 : 2.0000000 sec  
DELTA : 0.0000000 sec  
DELTA2 : 1.4000000 sec  
NUC1 : 13C  
NUC2 : 13C  
MCHX : 0.0100000 sec

\*\*\*\*\* CHANNEL f1 \*\*\*\*\*  
NUC1 : 13C  
P1 : 4.75 umsec  
PL1 : 0.00 dB  
SFO1 : 100.6261200 MHz

\*\*\*\*\* CHANNEL f2 \*\*\*\*\*  
CHPROG : zgpg30  
NUC2 : 1H  
P2 : 12.00 umsec  
PL2 : 0.00 dB  
PL12 : 19.00 dB  
PL13 : 19.50 dB  
SFO2 : 400.1464000 MHz

F2 - Processing parameters  
SI : 32768  
SF : 100.6261200 MHz  
WDW : EM  
SSB : 0  
GB : 0  
PC : 1.40



**(E)-Methyl 2-(2-(4-(1-methoxy-1-oxo-3-phenylpropan-2-yl)carbamoyl)phenyl)hydrazono)-3-oxobutanoate (1g)**

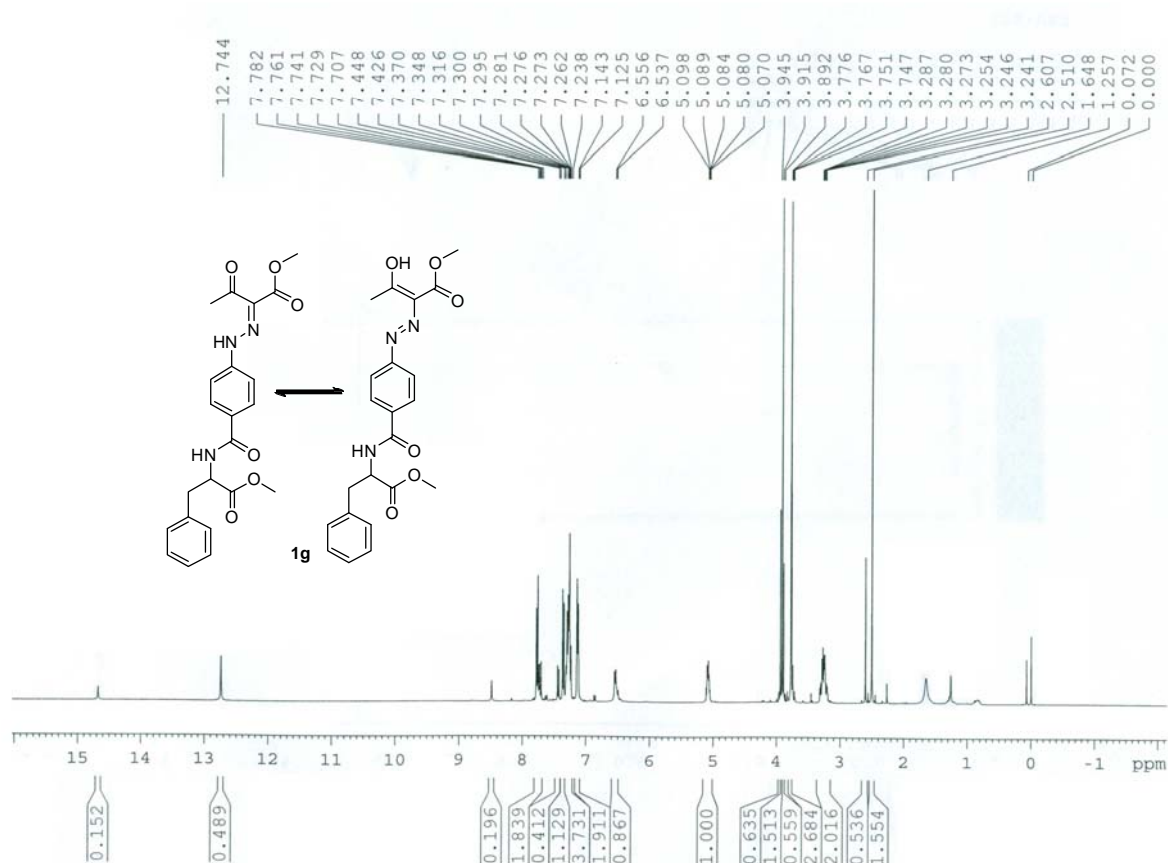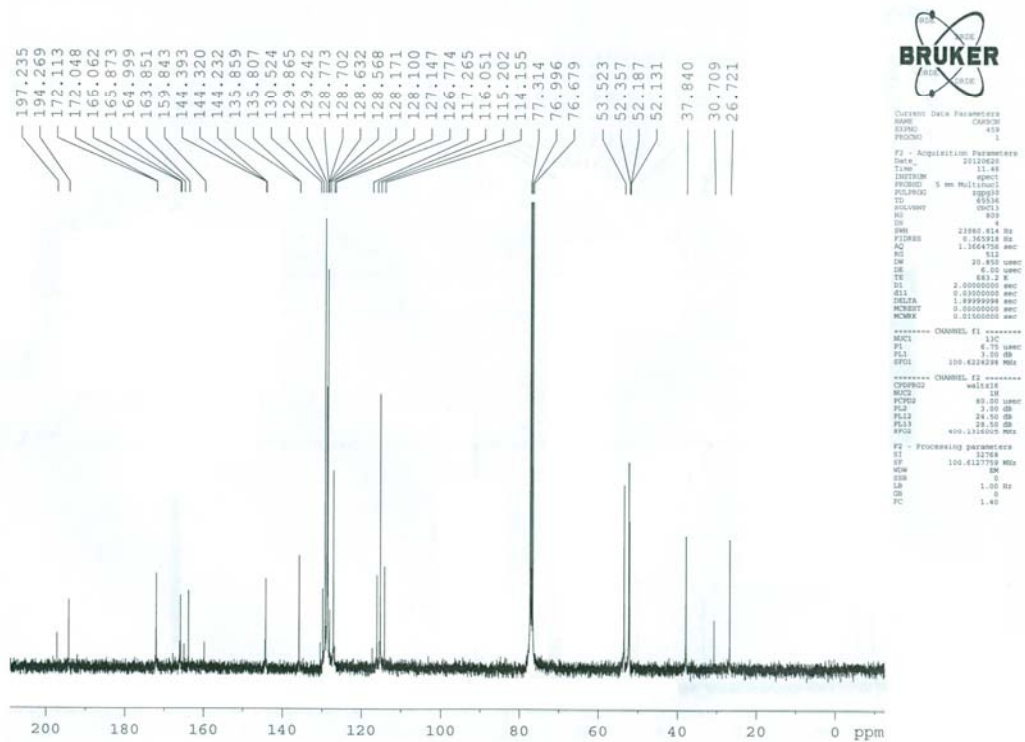

**(E)-Isobutyl 2-(2-(4-(1-methoxy-1-oxo-3-phenylpropan-2-ylcarbamoyl)phenyl)hydrazono)-3-oxobutanoate (1h)**

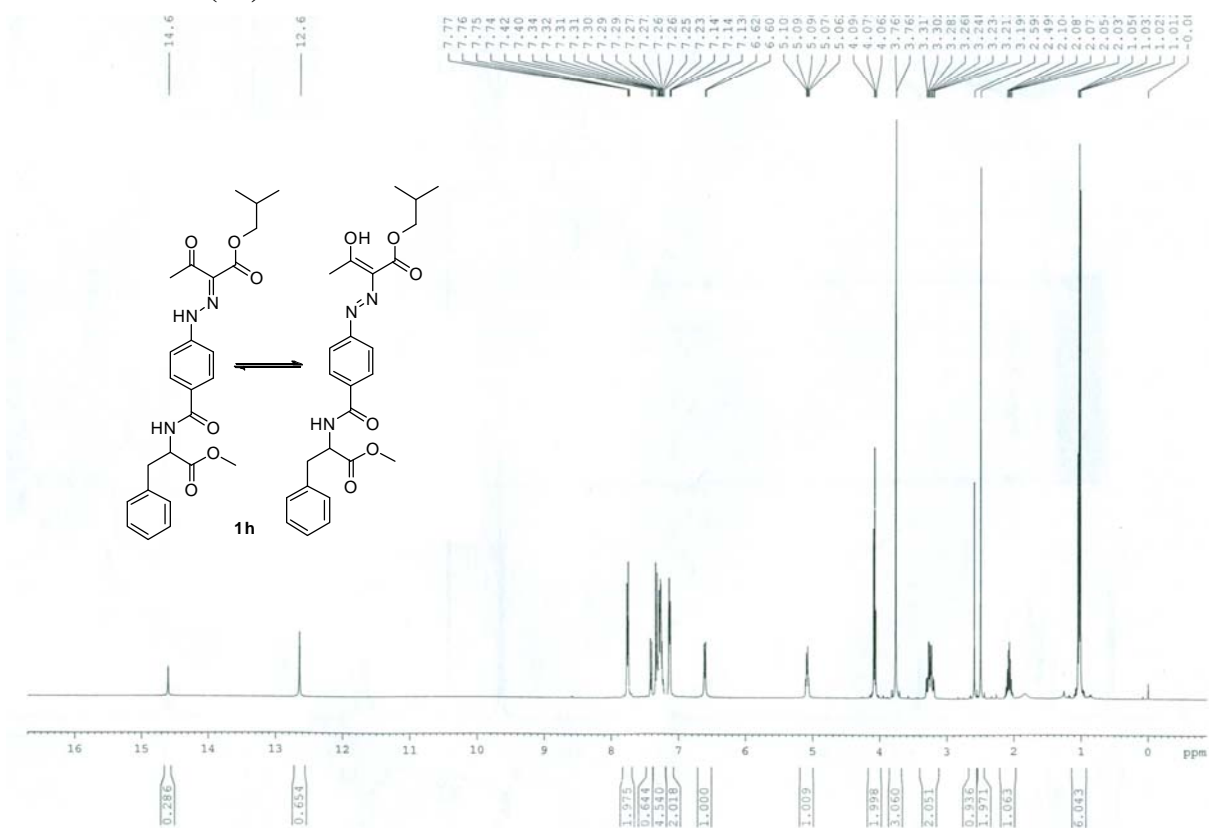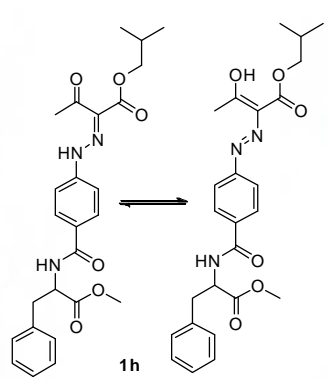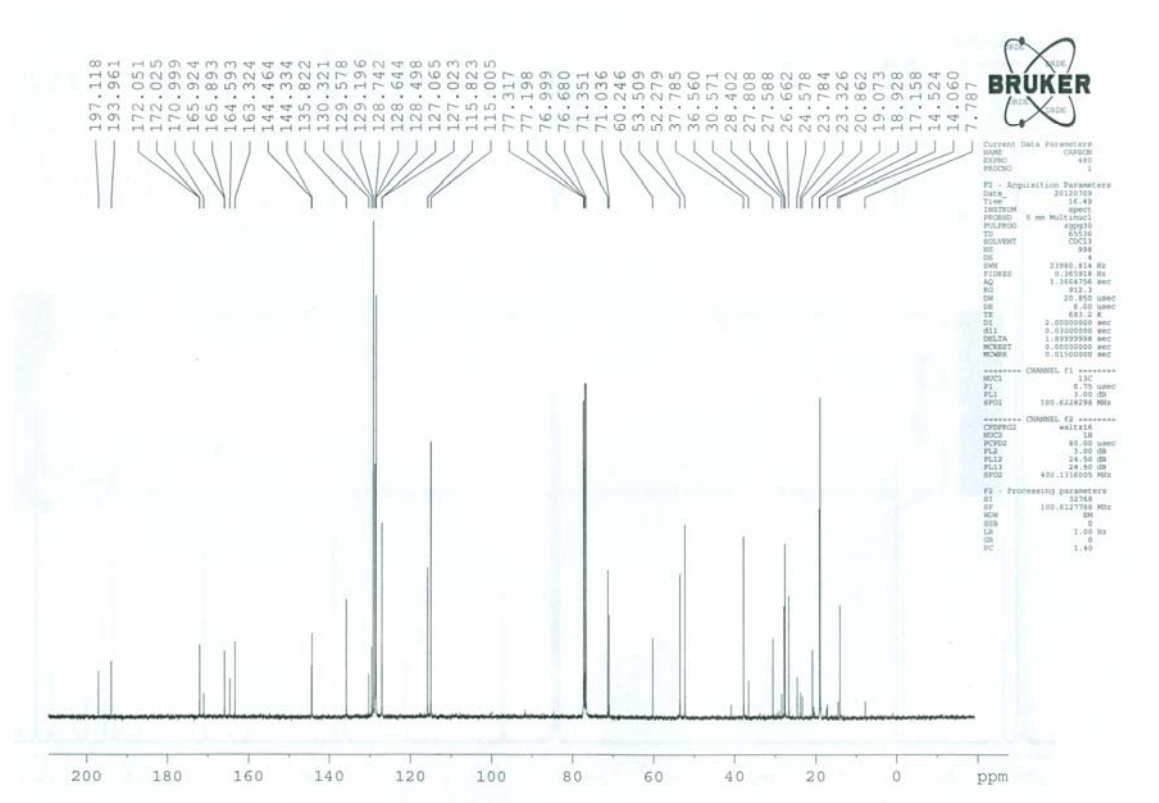

**(E)-Ethyl 4,4,4-trifluoro-3-hydroxy-2-((E)-(4-(1-methoxy-1-oxo-3-phenylpropan-2-ylcarbamoyl) phenyl)diazenyl)but-2-enoate (1i)**

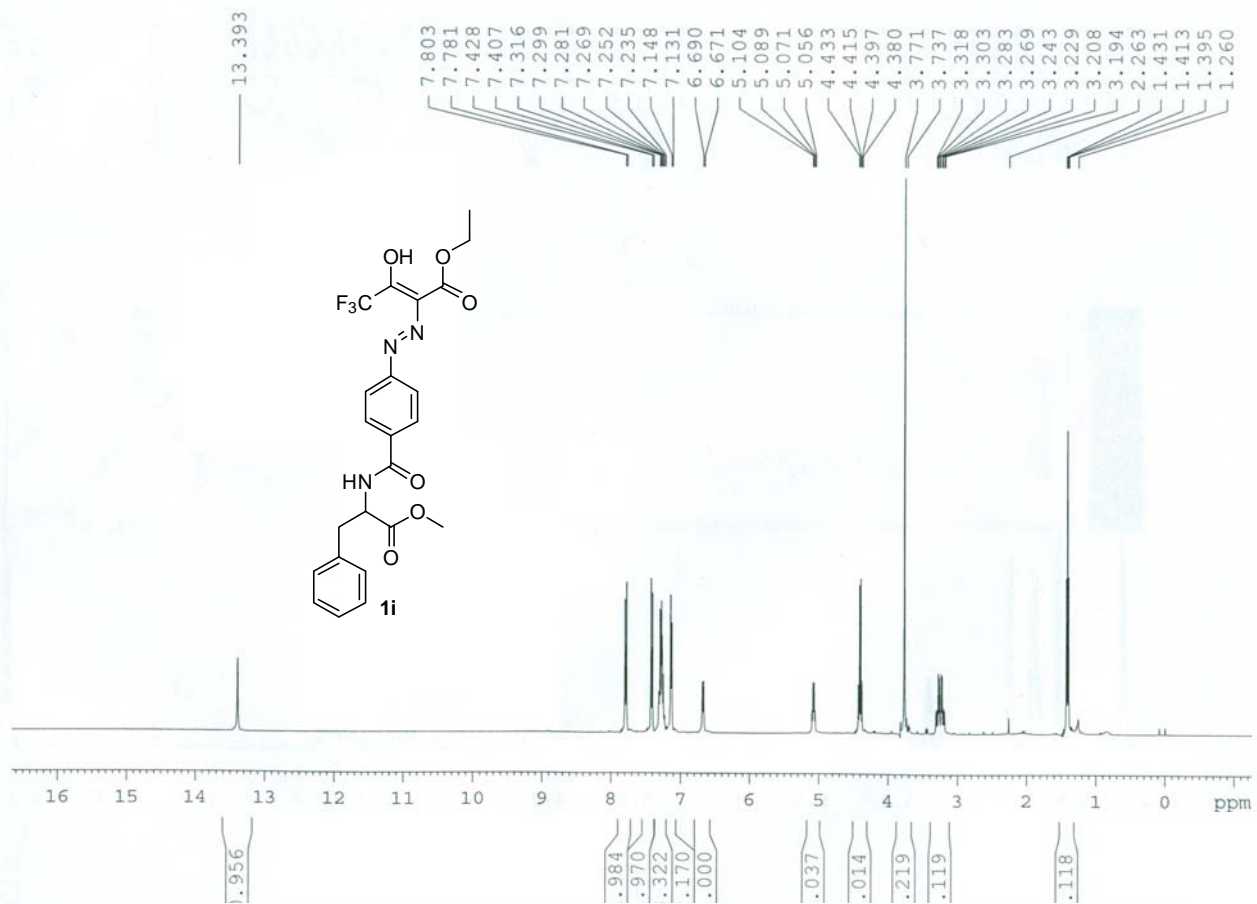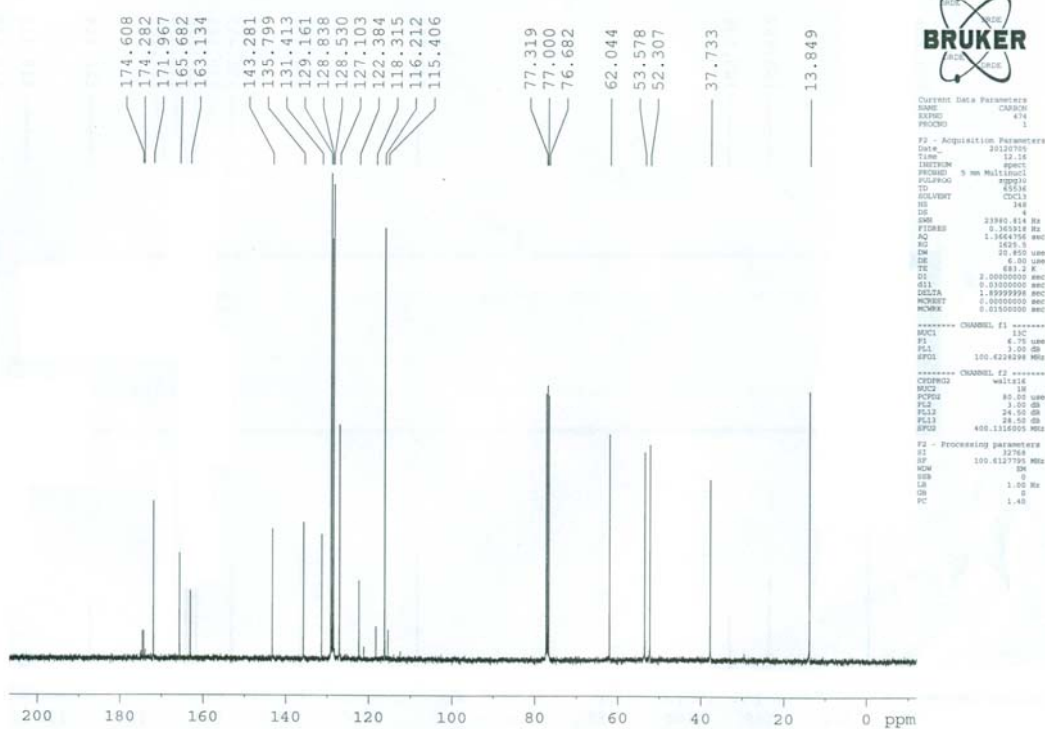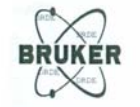

Current Data Parameters  
 NAME: CASHN  
 EXPNO: 474  
 PROCNO: 1  
 F2 - Acquisition Parameters  
 Date\_ 20120705  
 TIME 12.16  
 INSTRUM spect  
 PULPROG 5 mm Multispec1  
 PGPPROG ppzg1  
 TD 65536  
 SOLVENT CDCl3  
 NS 340  
 DS 4  
 SFO 2990.014 Hz  
 FIDRES 0.365018 Hz  
 AQ 1.364756 sec  
 RG 320.5  
 DM 30.800 umsec  
 DE 6.30 umsec  
 TE 300.2 K  
 D1 2.0000000 sec  
 d11 0.0100000 sec  
 DELTA 1.8999999 sec  
 MCHRG 0.0000000 sec  
 MCHRX 0.0100000 sec  
 \*\*\*\*\* CHANNEL f1 \*\*\*\*\*  
 NUCL1 13C  
 P1 6.76 umsec  
 PL1 1.00 dB  
 SFO1 100.6264000 MHz  
 \*\*\*\*\* CHANNEL f2 \*\*\*\*\*  
 CPDPRG2 waltz16  
 MUX2 16  
 PULPROG 80.00 umsec  
 PC2 1.00 dB  
 PL2 24.50 dB  
 PL12 24.50 dB  
 SFO2 400.1464000 MHz  
 F2 - Processing parameters  
 SI 32768  
 SF 100.6137950 MHz  
 MW 0  
 SW 1.00 Hz  
 GB 0  
 PC 1.40

**(E)-Ethyl 2-(2-(4-(1-methoxy-1-oxo-3-phenylpropan-2-ylcarbamoyl)phenyl)hydrazono)-3-oxo-3-phenylpropanoate (1j)**

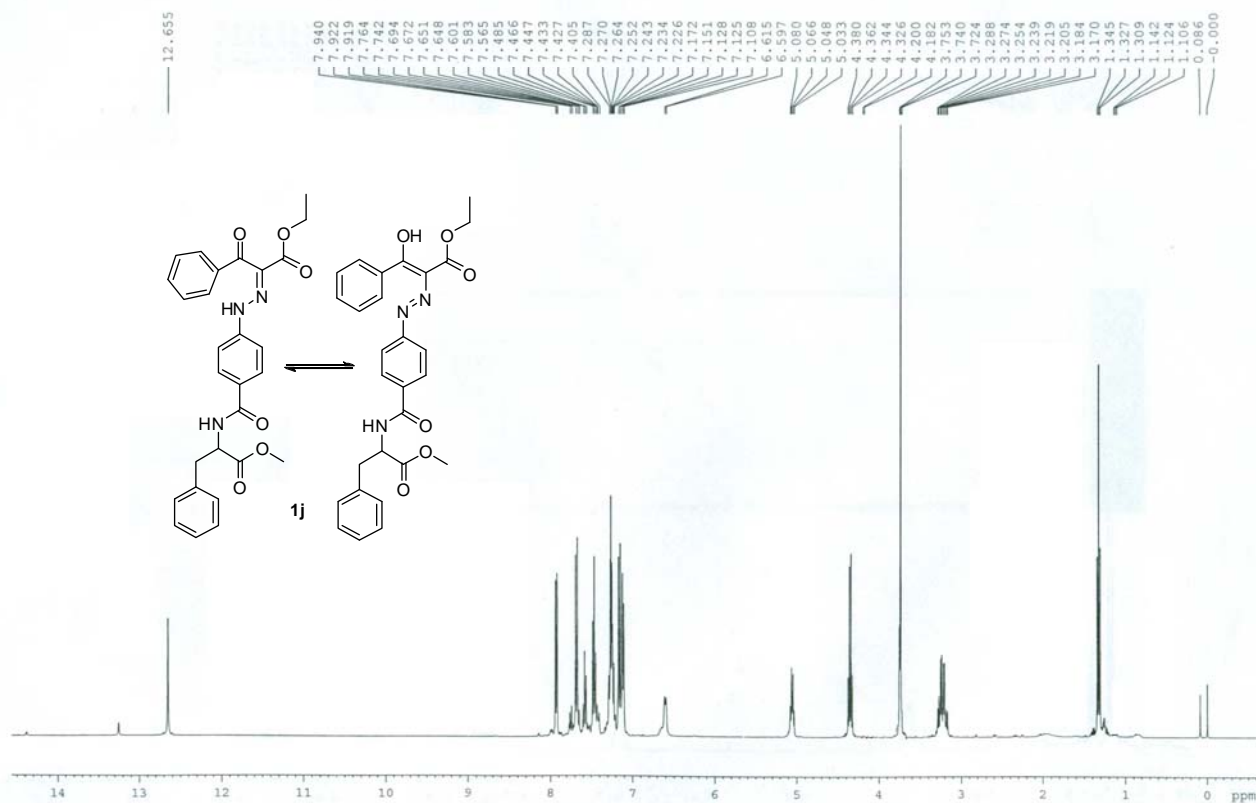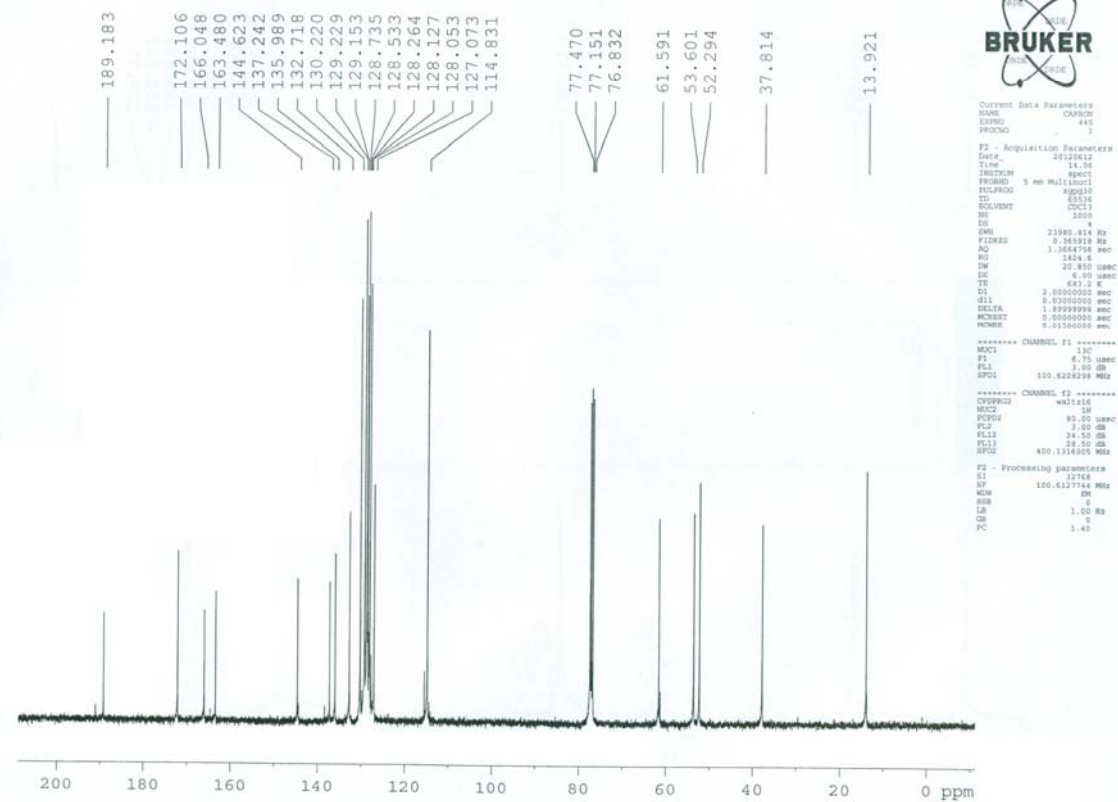

**(E)-dimethyl 2-(4-(2-(1-ethoxy-1,3-dioxobutan-2-ylidene)hydrazinyl)benzamido)succinate (1k)**

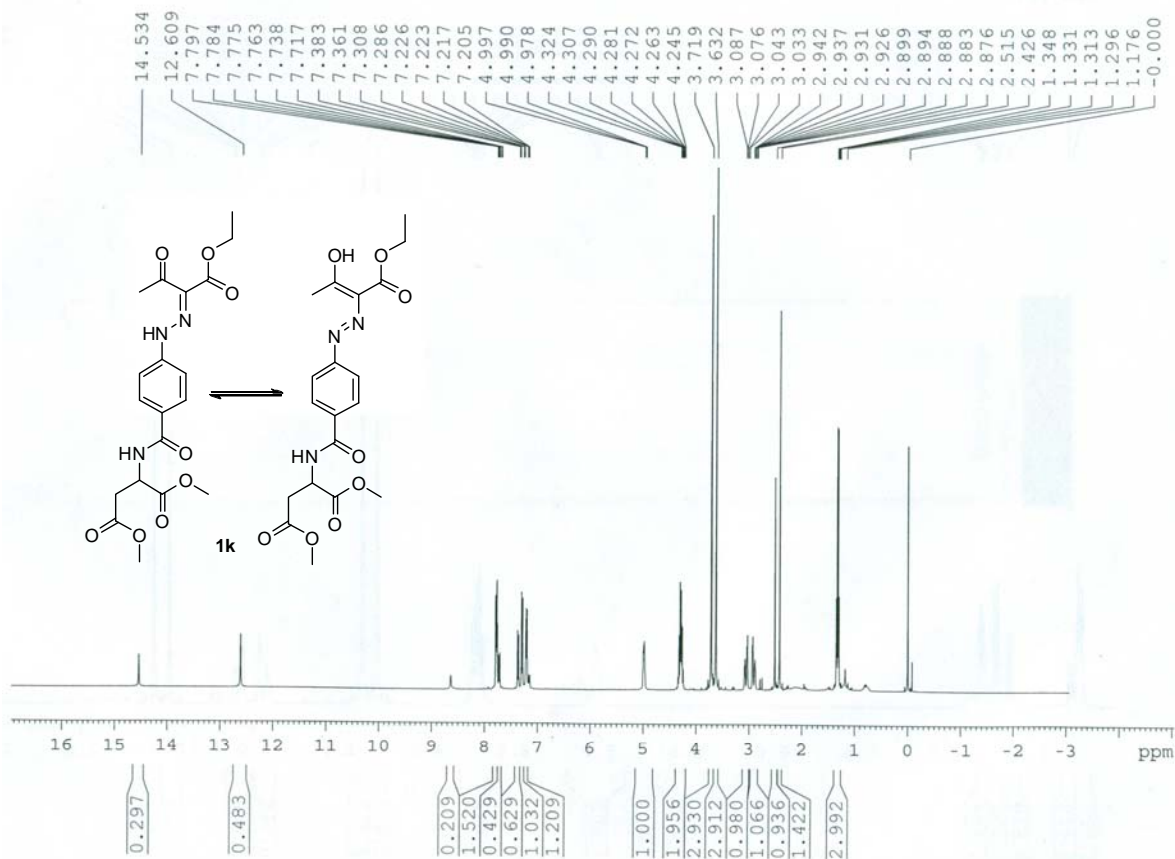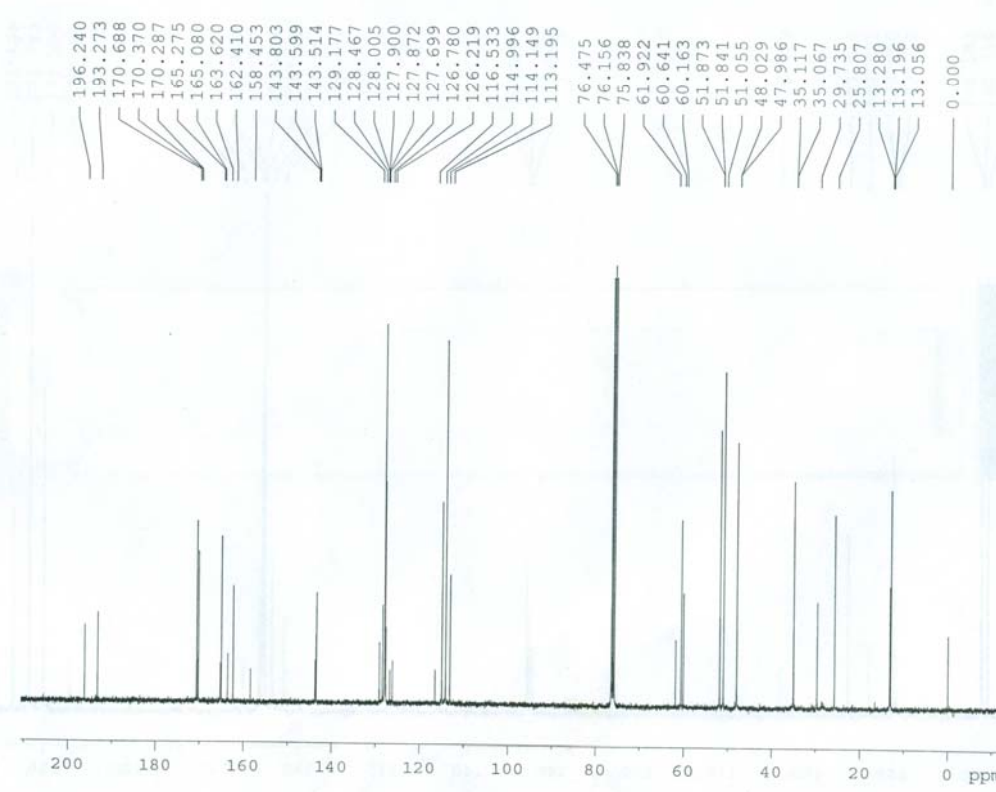

**BRUKER**

Current Data Parameters  
NAME: 1k  
EXPNO: 454  
PROCNO: 1

F2 - Acquisition Parameters  
Date\_ : 20120815  
Time : 11:29  
INSTRUM : spect  
PROBHD : 5 mm Multinuc1  
PULPROG : zgpg30  
TD : 65536  
SOLVENT : CDCl3  
NS : 1000  
DS : 4  
SWH : 23980.814 Hz  
FIDRES : 0.365918 Hz  
AQ : 1.3664756 sec  
RG : 344.2  
DE : 683.2 K  
TE : 20.850 usec  
SE : 2.0000000 usec  
SI : 0.21000000 usec  
SFO1 : 1.89999999 usec  
DELTA : 0.00000000 usec  
MCHSFT : 0.00000000 usec  
MCHSX : 0.01000000 usec

----- CHANNEL f1 -----  
NUC1 : 13C  
P1 : 6.75 usec  
PL1 : 3.00 dB  
SFO1 : 100.6284294 MHz

----- CHANNEL f2 -----  
CQPCPR2 : waltz16  
NUC2 : 1H  
PCPR2 : 85.00 usec  
PL2 : 3.00 dB  
PL12 : 24.50 dB  
PL13 : 24.50 dB  
SFO2 : 400.1314005 MHz

F2 - Processing parameters  
SI : 1744  
SF : 100.6126539 MHz  
WDW : EM  
SSB : 0  
LA : 3.00 Hz  
GB : 0  
PC : 1.40

**(E)-Dimethyl 2-(4-(2-(1-methoxy-1,3-dioxobutan-2-ylidene)hydrazinyl)benzamido)succinate (11)**

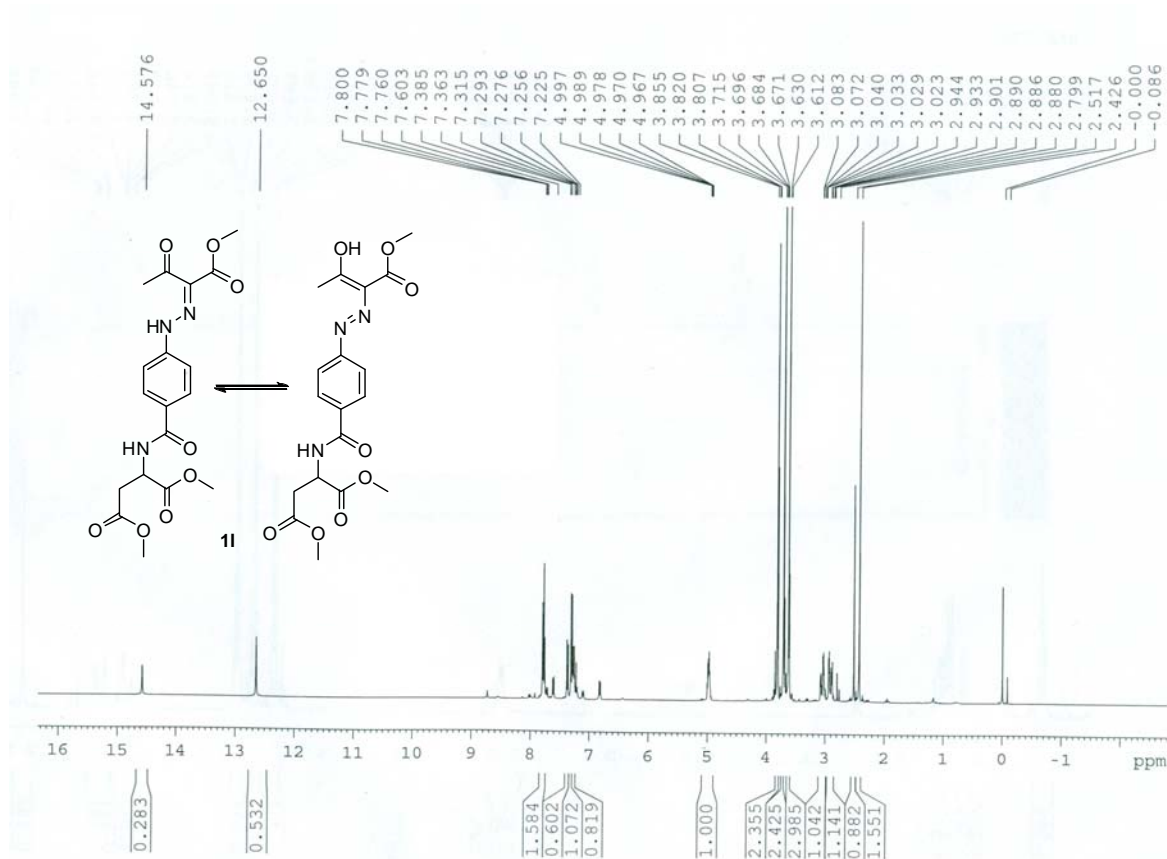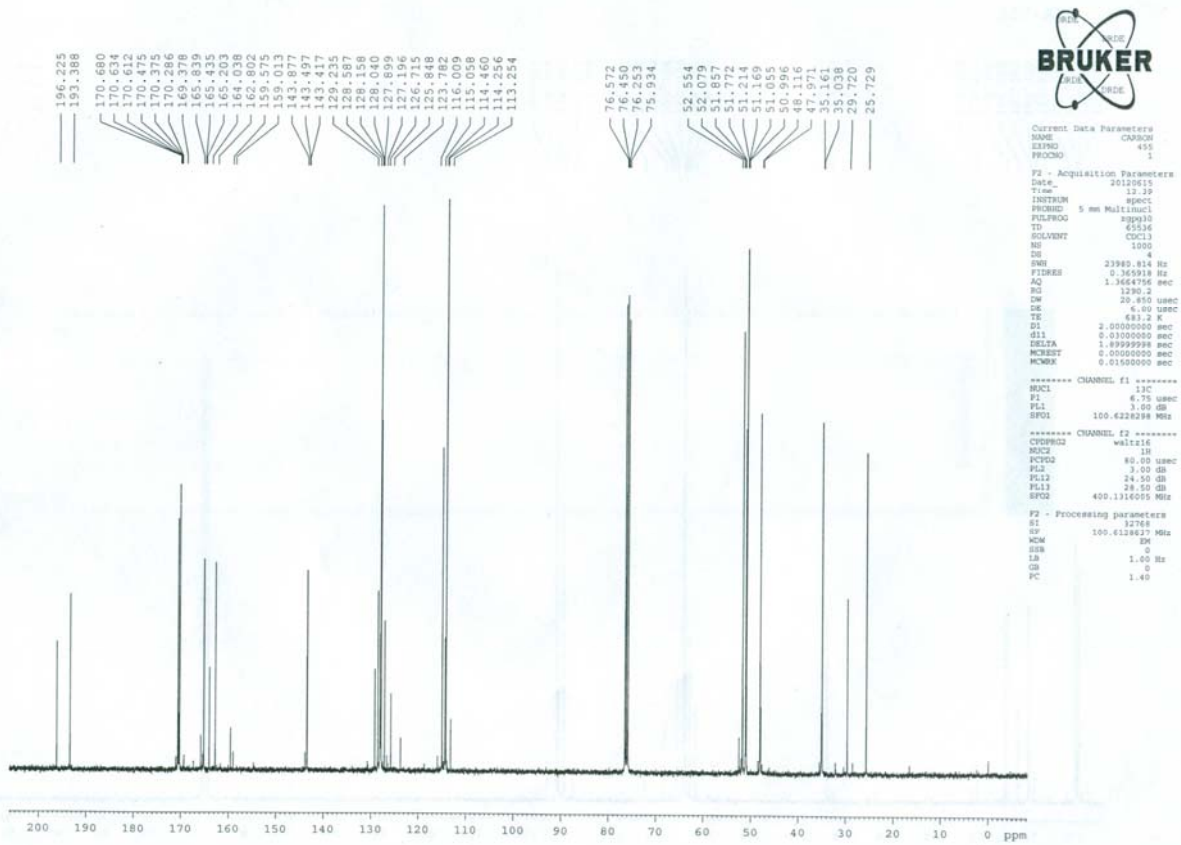

**(E)-Dimethyl 2-(4-(2-(1-isobutoxy-1,3-dioxobutan-2-ylidene)hydrazinyl)benzamido)succinate (1m)**

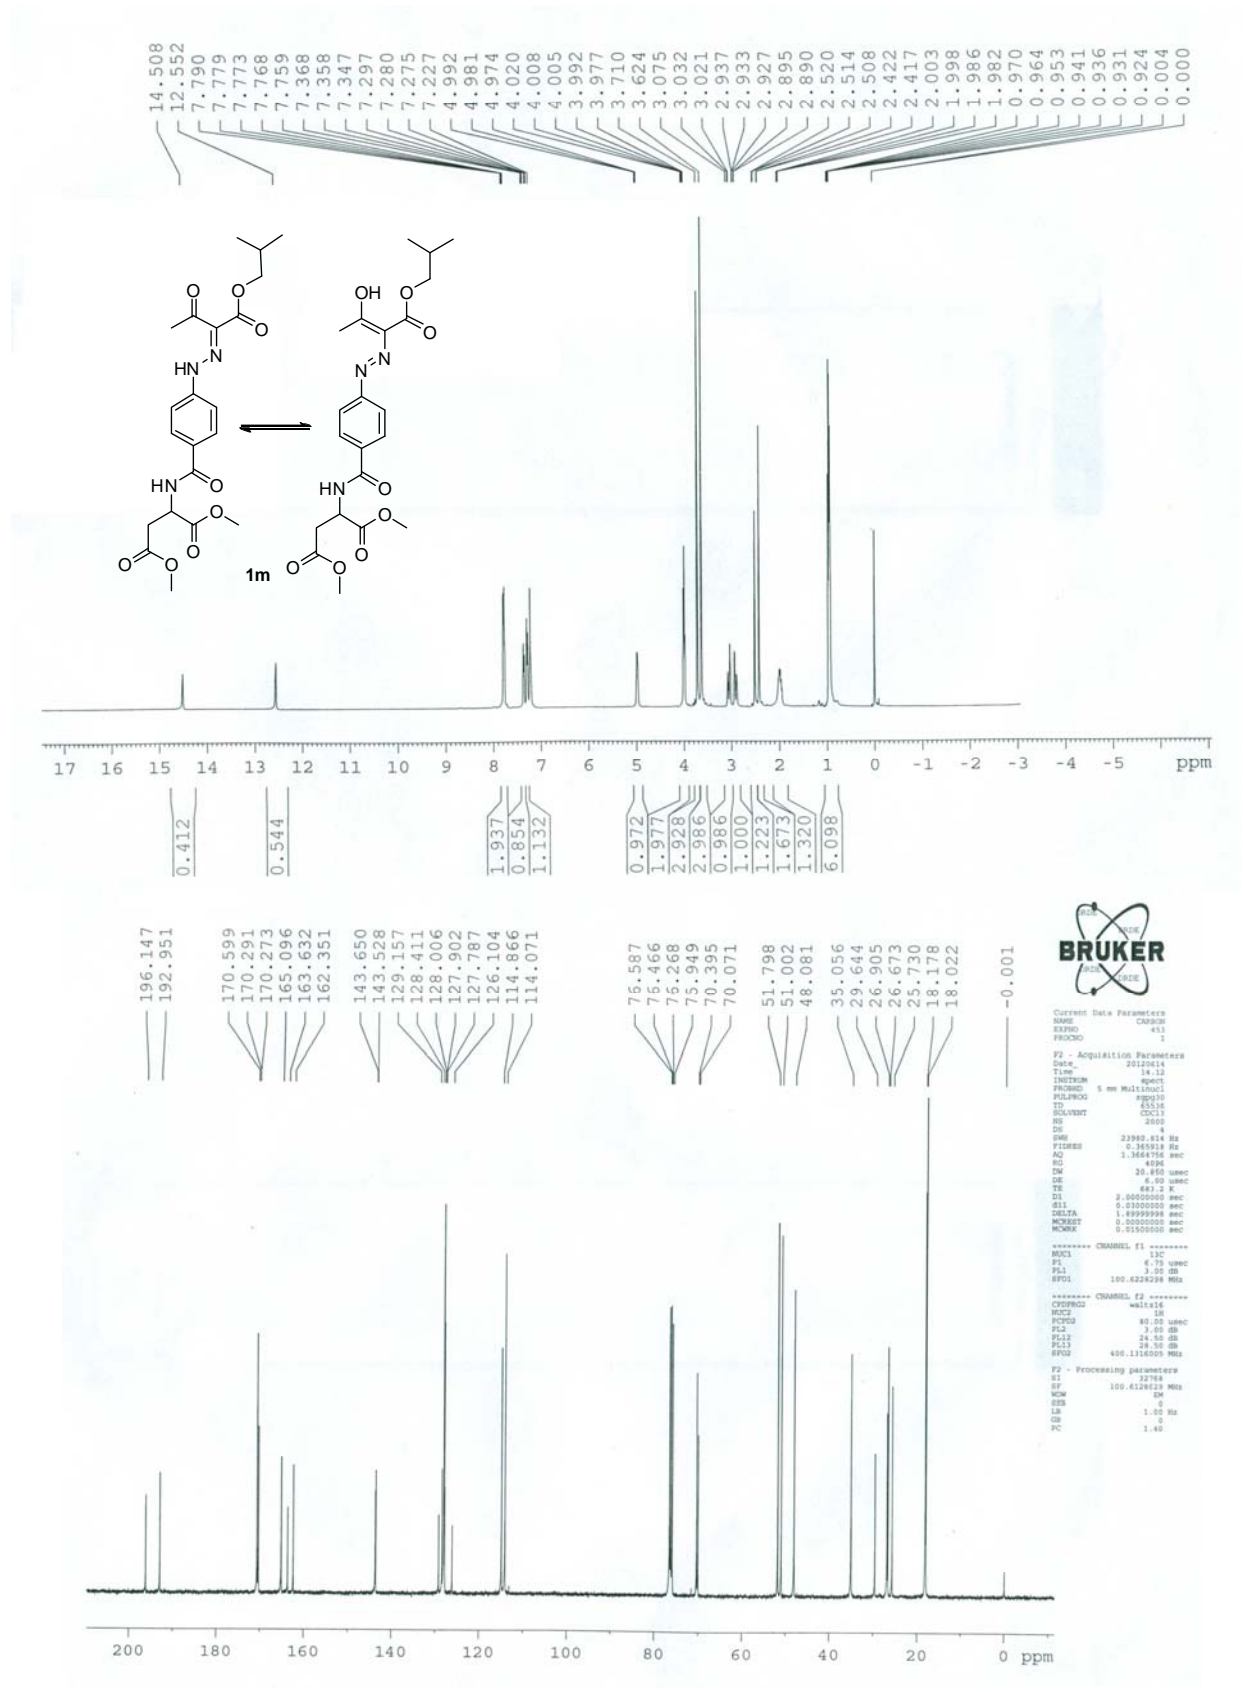

**Dimethyl 2-(4-((E)-((E)-1-ethoxy-4,4,4-trifluoro-3-hydroxy-1-oxobut-2-en-2-yl)diazenyl)benzamido) succinate (1n)**

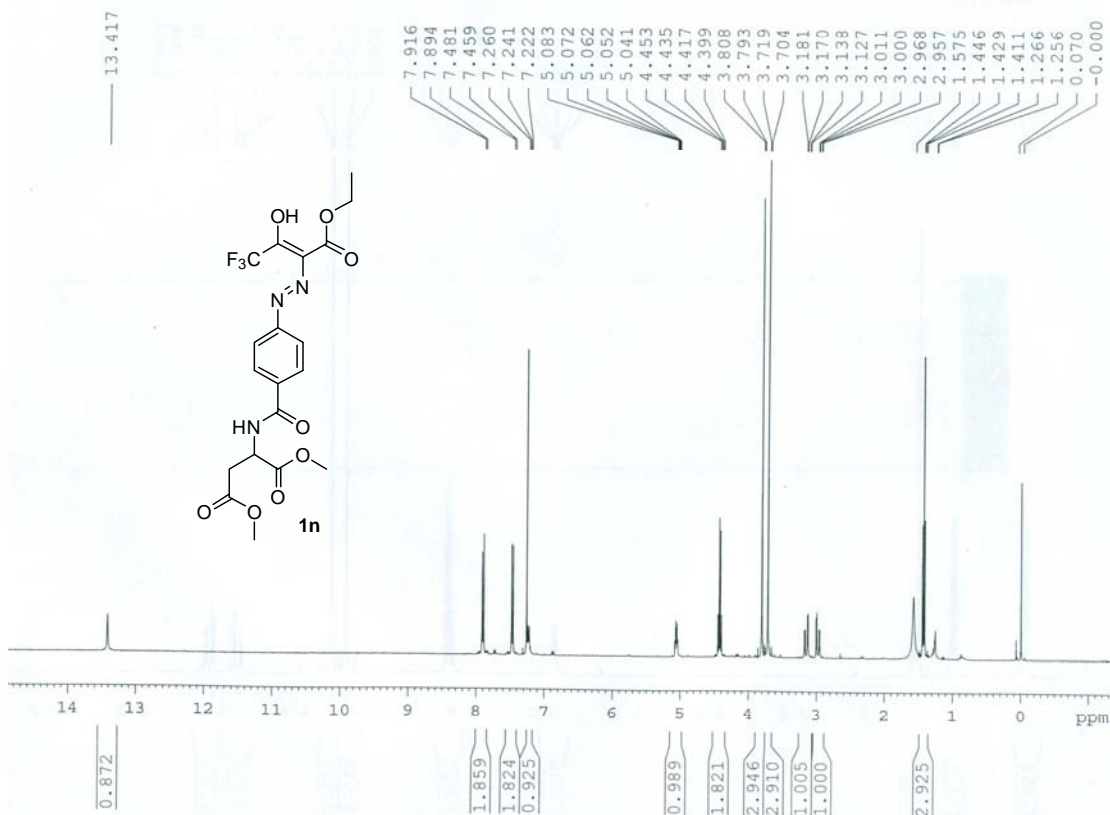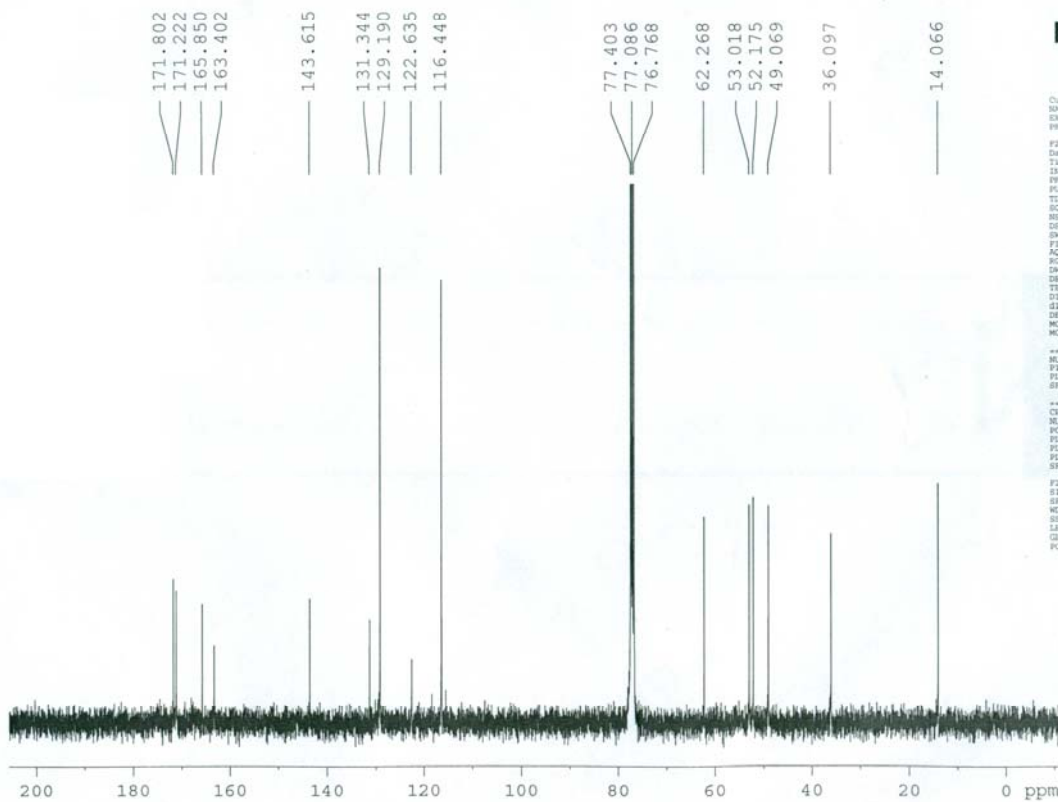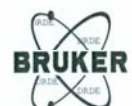

Current Data Parameters  
 NAME: CARBON  
 EXPNO: 462  
 PROCNO: 1

F2 - Acquisition Parameters  
 Date\_ : 20120220  
 Time : 12.44  
 INSTRUM : spect  
 PULPROG : zgpg30  
 TO : 25524  
 SOLVENT : CDCl3  
 NS : 1073  
 DS : 4  
 SWH : 23940.814 Hz  
 FIDRES : 0.165928 Hz  
 AQ : 1.3664756 sec  
 RG : 574.7  
 DW : 20.850 usec  
 DE : 6.00 usec  
 TE : 683.2 K  
 D1 : 2.0000000 sec  
 d11 : 0.0300000 sec  
 DELTA : 1.8999999 sec  
 MOUET : 0.0000000 sec  
 MOWKE : 0.0150000 sec

\*\*\*\*\* CHANNEL f1 \*\*\*\*\*  
 NUCL1 : 13C  
 P1 : 6.75 usec  
 PL1 : 3.00 dB  
 SFO1 : 100.628298 MHz

\*\*\*\*\* CHANNEL f2 \*\*\*\*\*  
 CYPFRG2 : waltz16  
 NUCL2 : 1H  
 PCYF2 : 80.00 usec  
 PL2 : 3.00 dB  
 PL12 : 24.50 dB  
 PL13 : 24.50 dB  
 SFO2 : 400.1316005 MHz

F2 - Processing parameters  
 SI : 32768  
 SF : 100.6127612 MHz  
 MW : 0  
 SW : 1.00 Hz  
 GB : 0  
 PC : 1.40



**(E)-Dimethyl 2-(4-(2-(1-ethoxy-1,3-dioxo-3-phenylpropan-2-ylidene)hydrazinyl)benzamido)succinate (1o)**

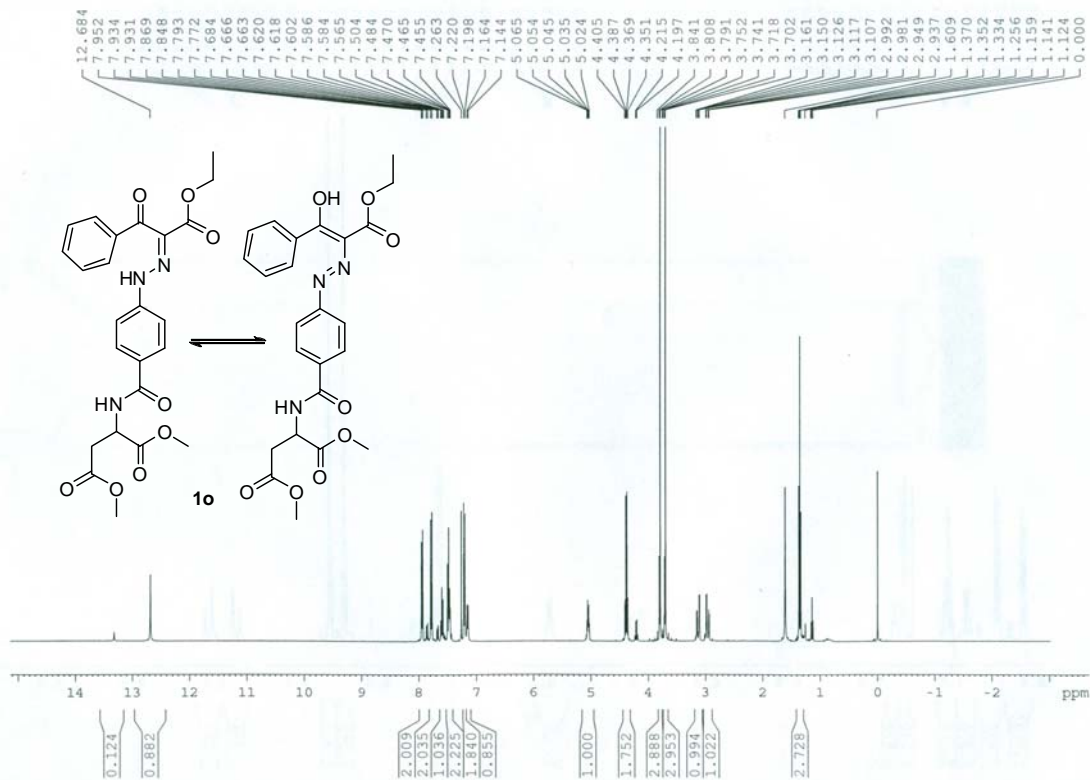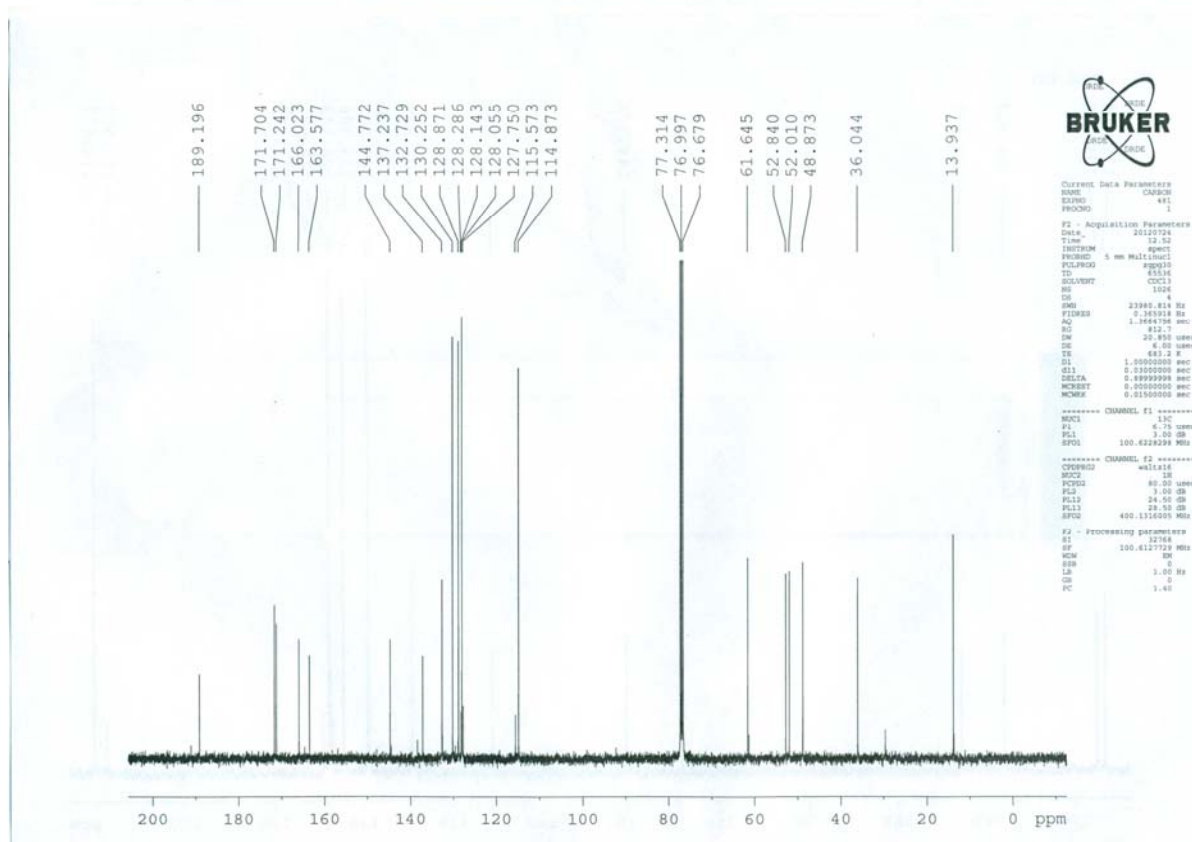

# <sup>1</sup>H-NMR and ROESY spectrum of compound 1a to explain keto-enol tautomerism

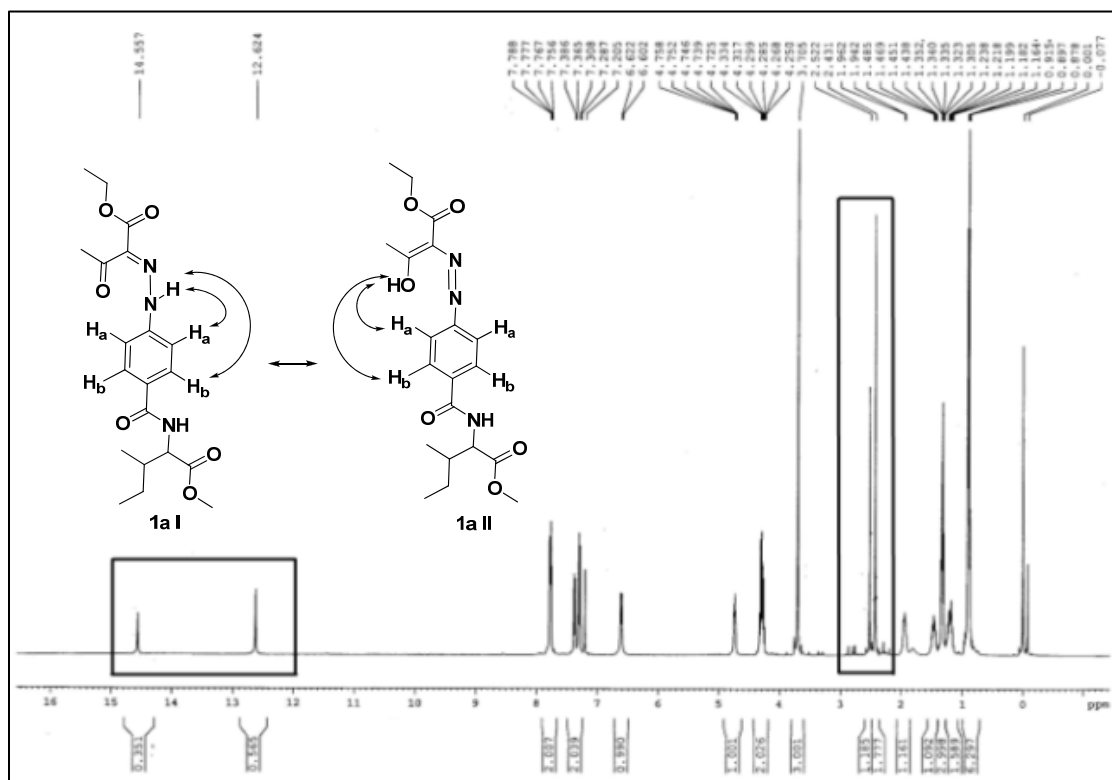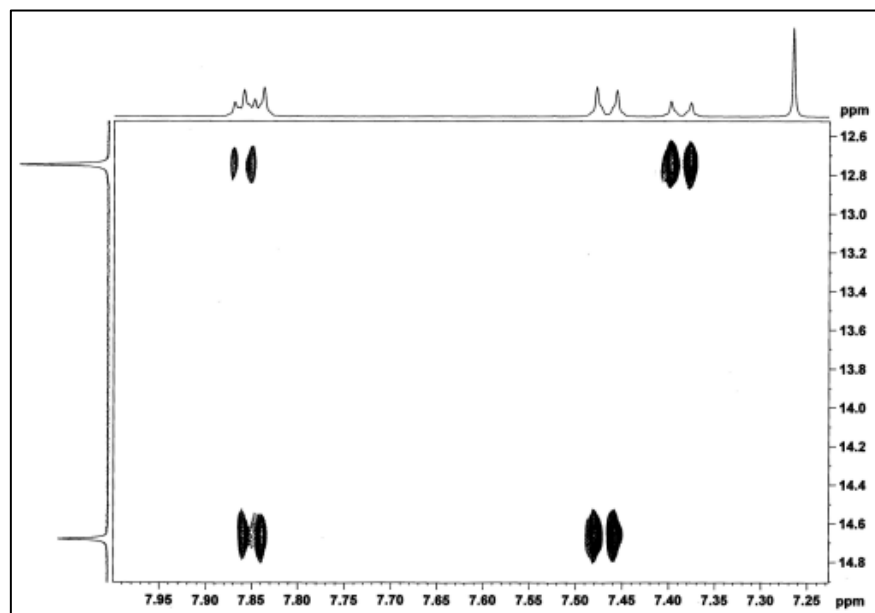

Supplement: c4nj00647j1.pdf [file c4nj00647j1.pdf]
